# Supplementary material for: Asymmetric synthesis of α,β-diamino acid derivatives with an aziridine-, azetidine- and γ-lactone-skeleton via Mannich-type additions across α-chloro-N-sulfinylimines
Source: Royal Society of Chemistry journal article supplement (doi:10.1039/c2ob06637h), 2011-12-09

# Asymmetric synthesis of $\alpha,\beta$ -diamino acid derivatives with an aziridine-, azetidine- and $\gamma$ -lactone-skeleton via Mannich-type additions across $\alpha$ -chloro-*N*- sulfinylimines

Gert Callebaut,<sup>†,‡</sup> Sven Mangelinckx,<sup>†,§</sup> Loránd Kiss,<sup>||</sup> Reijo Sillanpää,<sup>¶</sup> Ferenc Fülöp<sup>||</sup> and  
Norbert De Kimpe<sup>\*,†</sup>

*Department of Sustainable Organic Chemistry and Technology, Faculty of Bioscience  
Engineering, Ghent University, Coupure Links 653, B-9000 Ghent, Belgium, Institute of  
Pharmaceutical Chemistry, University of Szeged, H-6701 Szeged, P.O. Box 427, Hungary,  
and Department of Chemistry, University of Jyväskylä, Fin-40351, Jyväskylä, Finland*

*norbert.dekimpe@UGent.be*

## Supporting Information

### Table of Contents

|                                                                                                                                                                                                  |    |
|--------------------------------------------------------------------------------------------------------------------------------------------------------------------------------------------------|----|
| I. Copies of <sup>1</sup> H NMR and <sup>13</sup> C NMR spectra of <b>3</b> , <b>5</b> , <b>6</b> , <b>8</b> , <b>9</b> , <b>13</b> , <b>17-19</b> , <b>21</b> , <b>23</b> , <i>syn-24</i> ..... | 2  |
| II. Copy of chiral HPLC spectrum of <b>16</b> .....                                                                                                                                              | 38 |

---

\* To whom correspondence should be addressed. Tel: +32 (0)9 264 59 51. Fax: +32 (0)9 264 62 21.

‡ Aspirant of the “Institute for the Promotion of Innovation through Science and Technology – Flanders (IWT-Vlaanderen)”.

§ Postdoctoral Fellow of the Research Foundation – Vlaanderen (FWO)

† Ghent University.

|| University of Szeged.

¶ University of Jyväskylä.

**I. Copies of  $^1\text{H}$  NMR and  $^{13}\text{C}$  NMR spectra of 3, 5, 6, 8, 9, 13, 17-19, 21, 23 and *syn*-24**

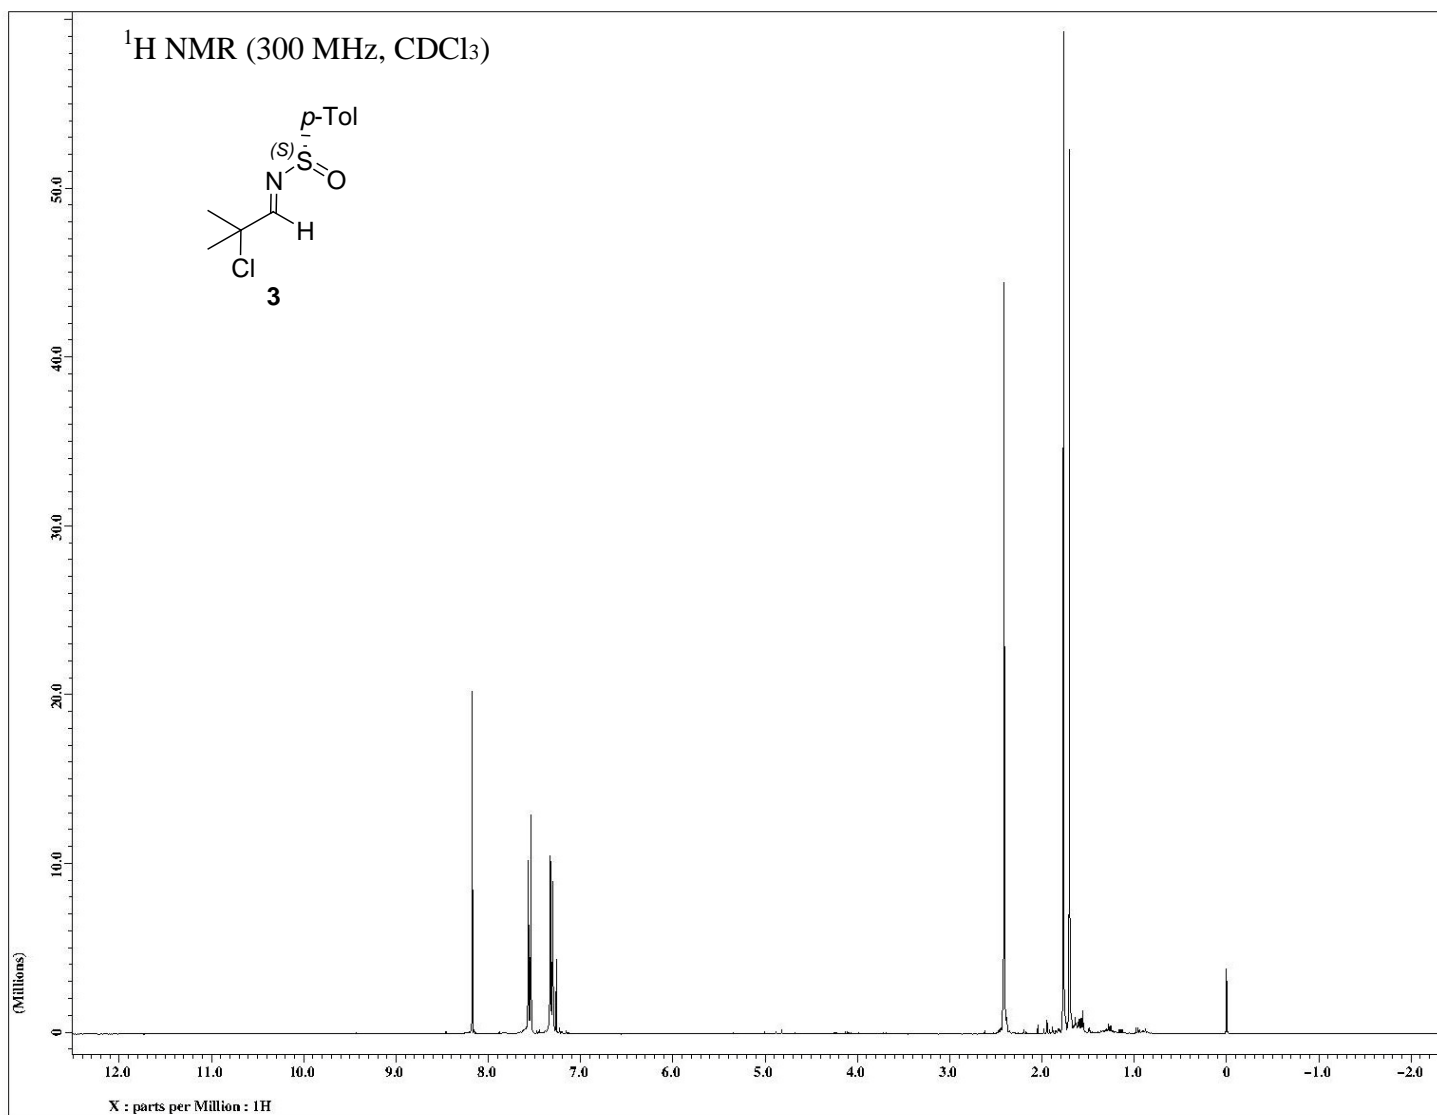

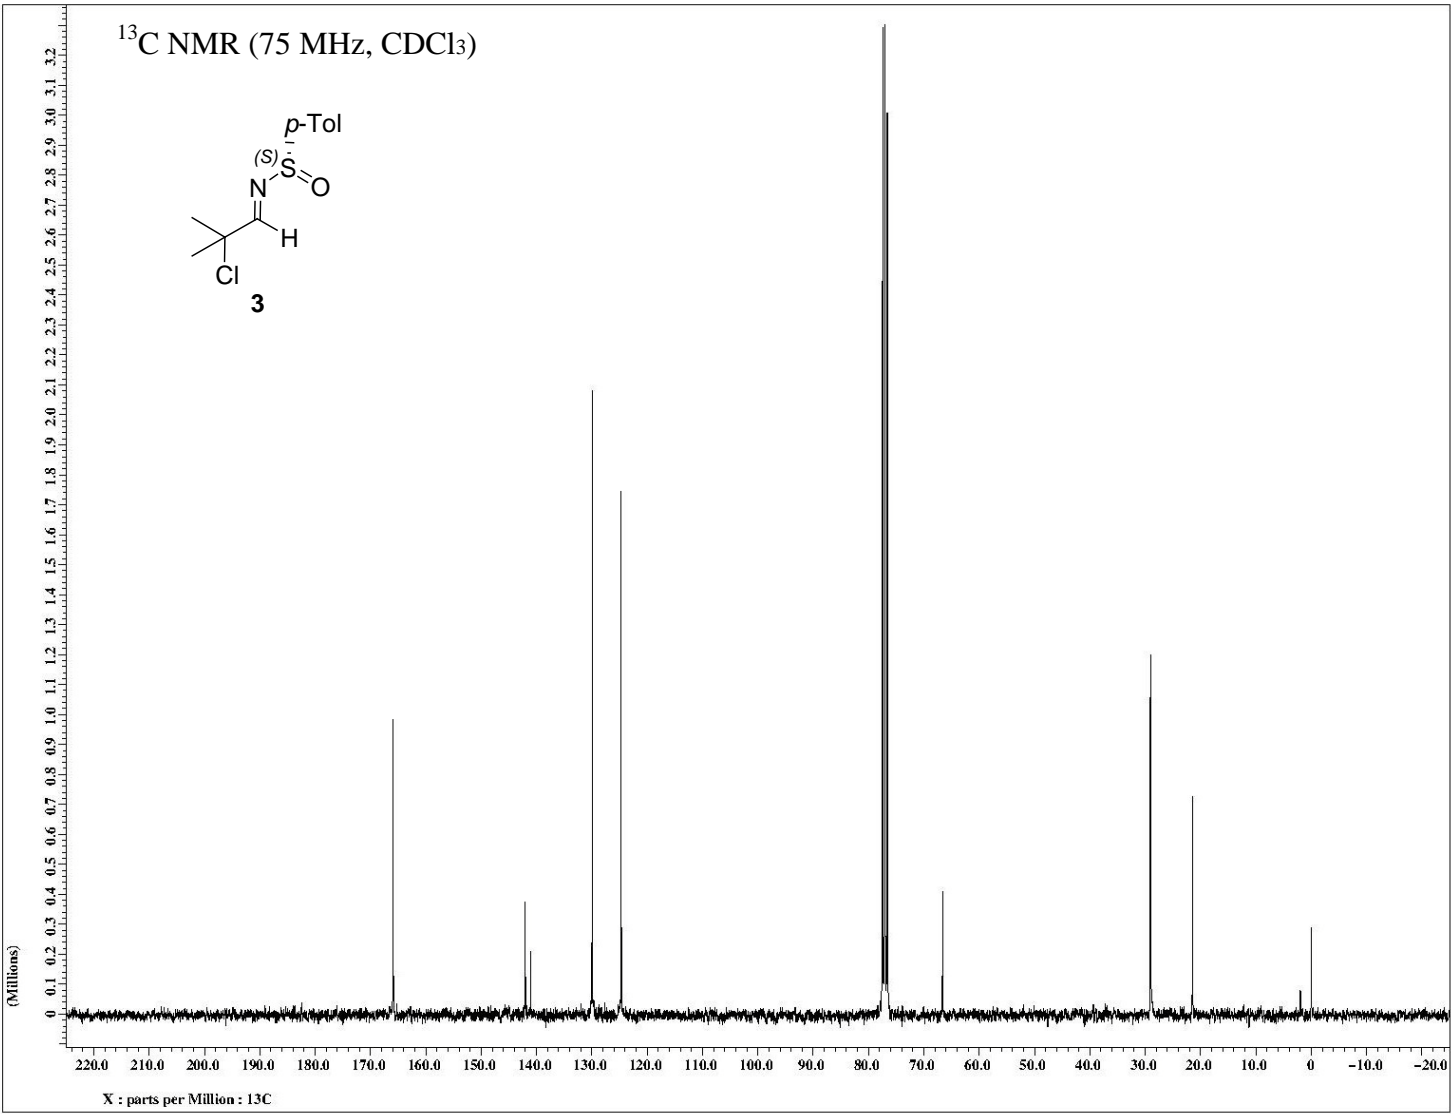

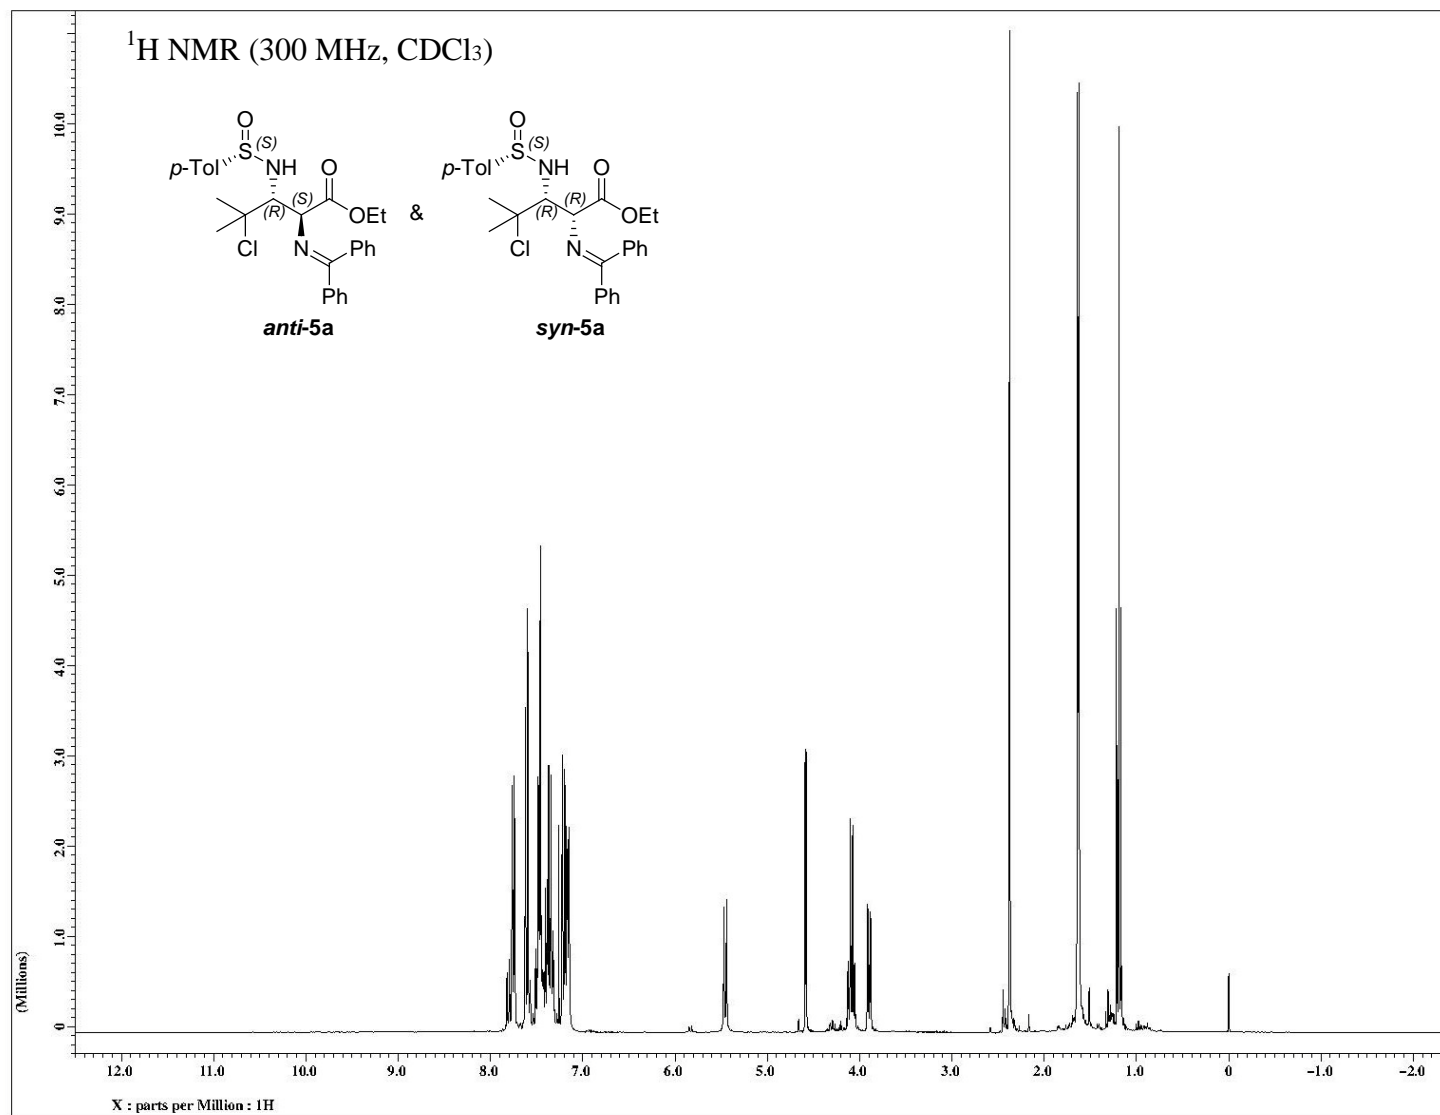

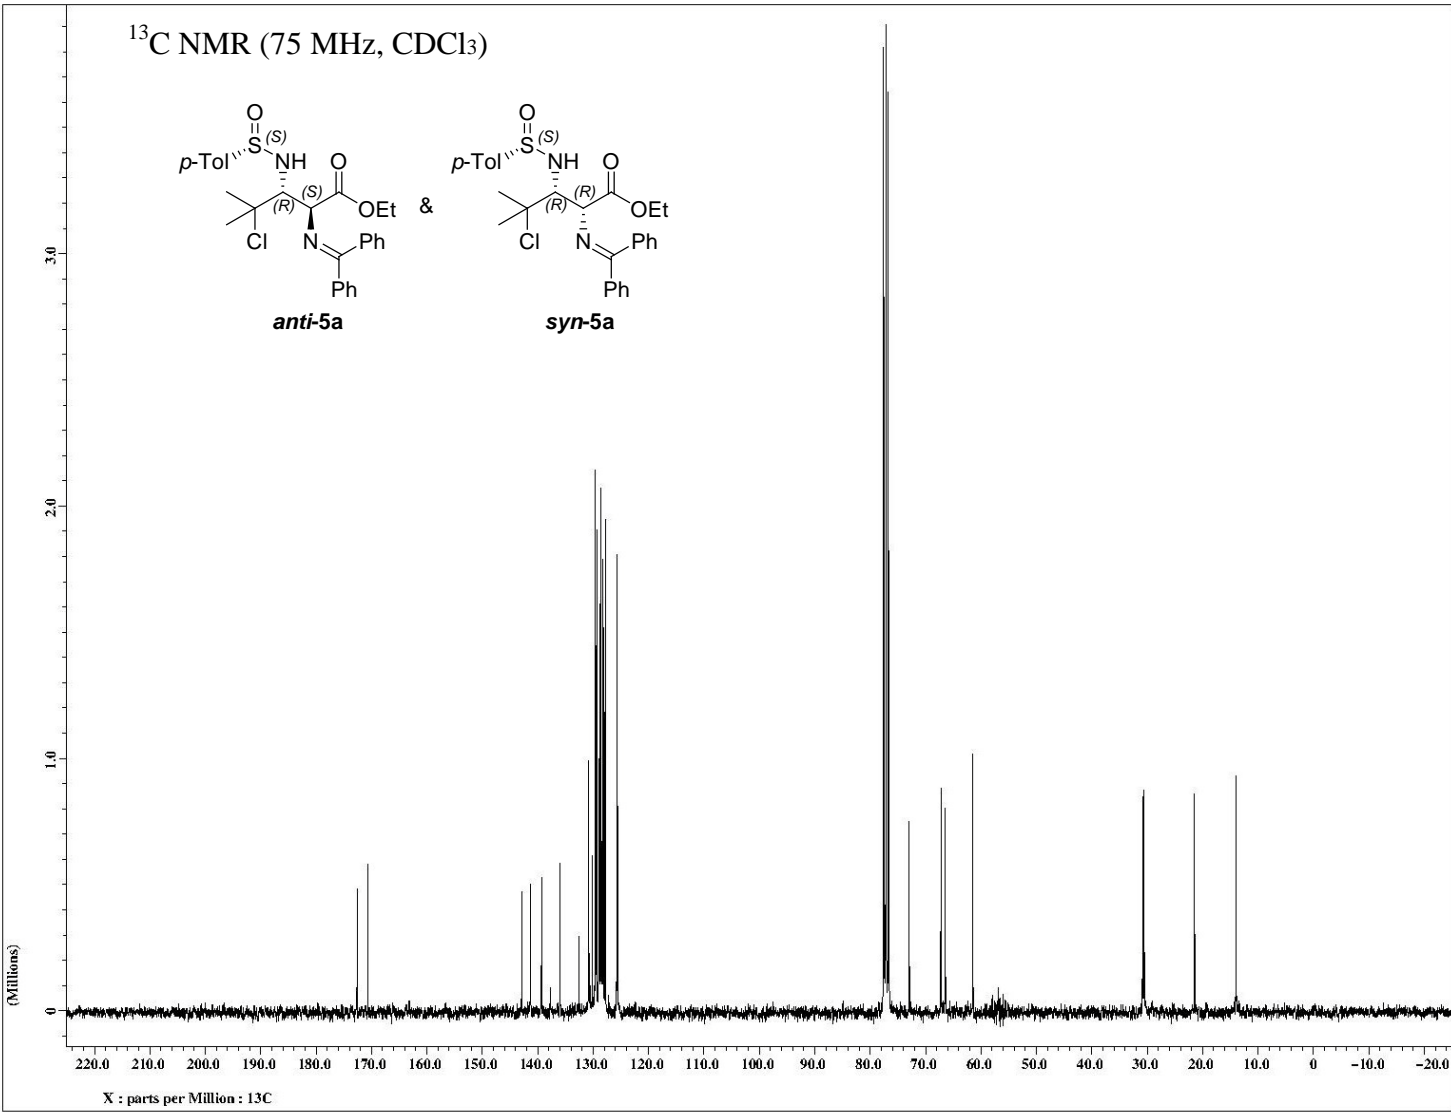

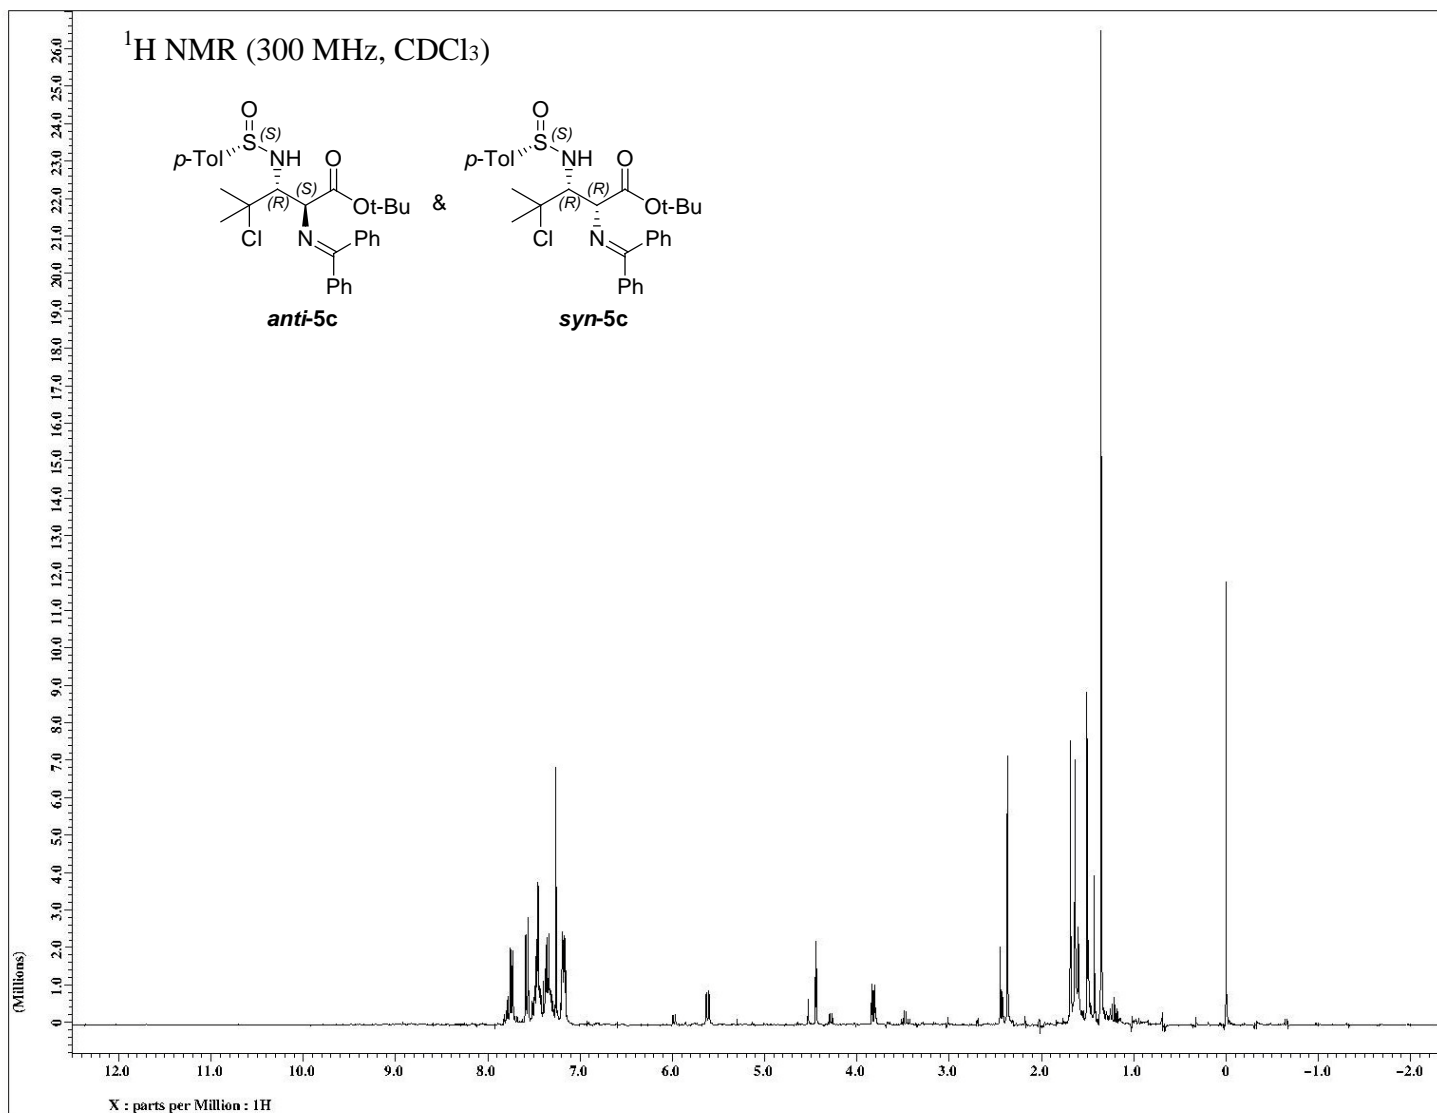

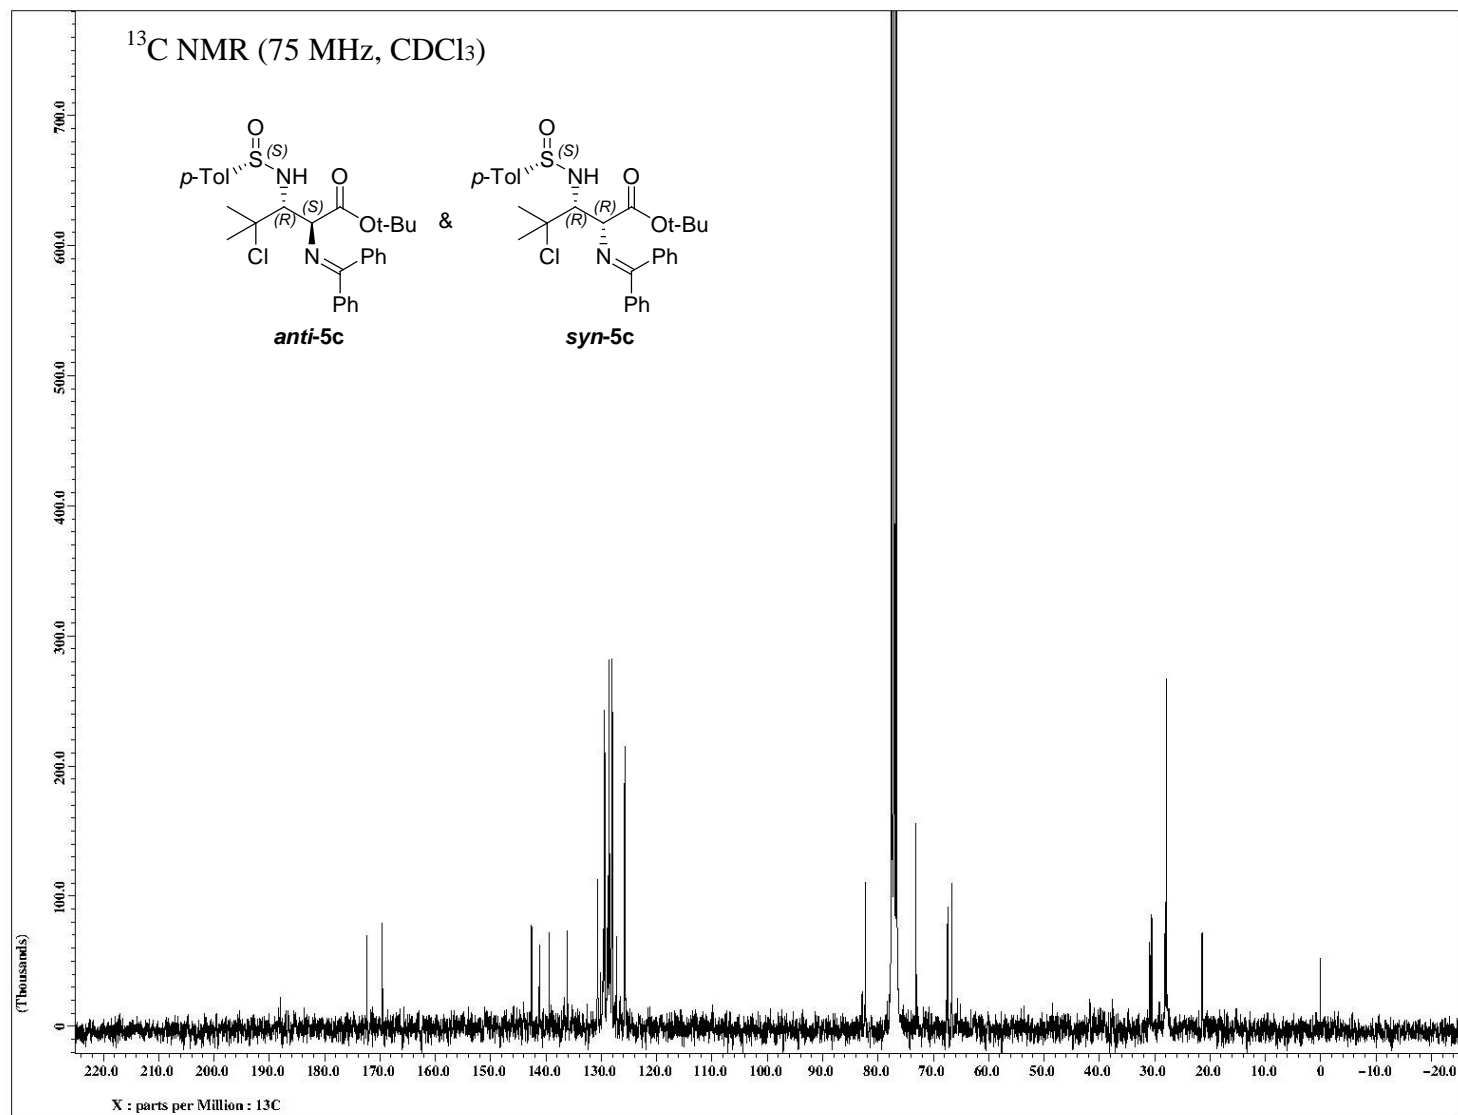

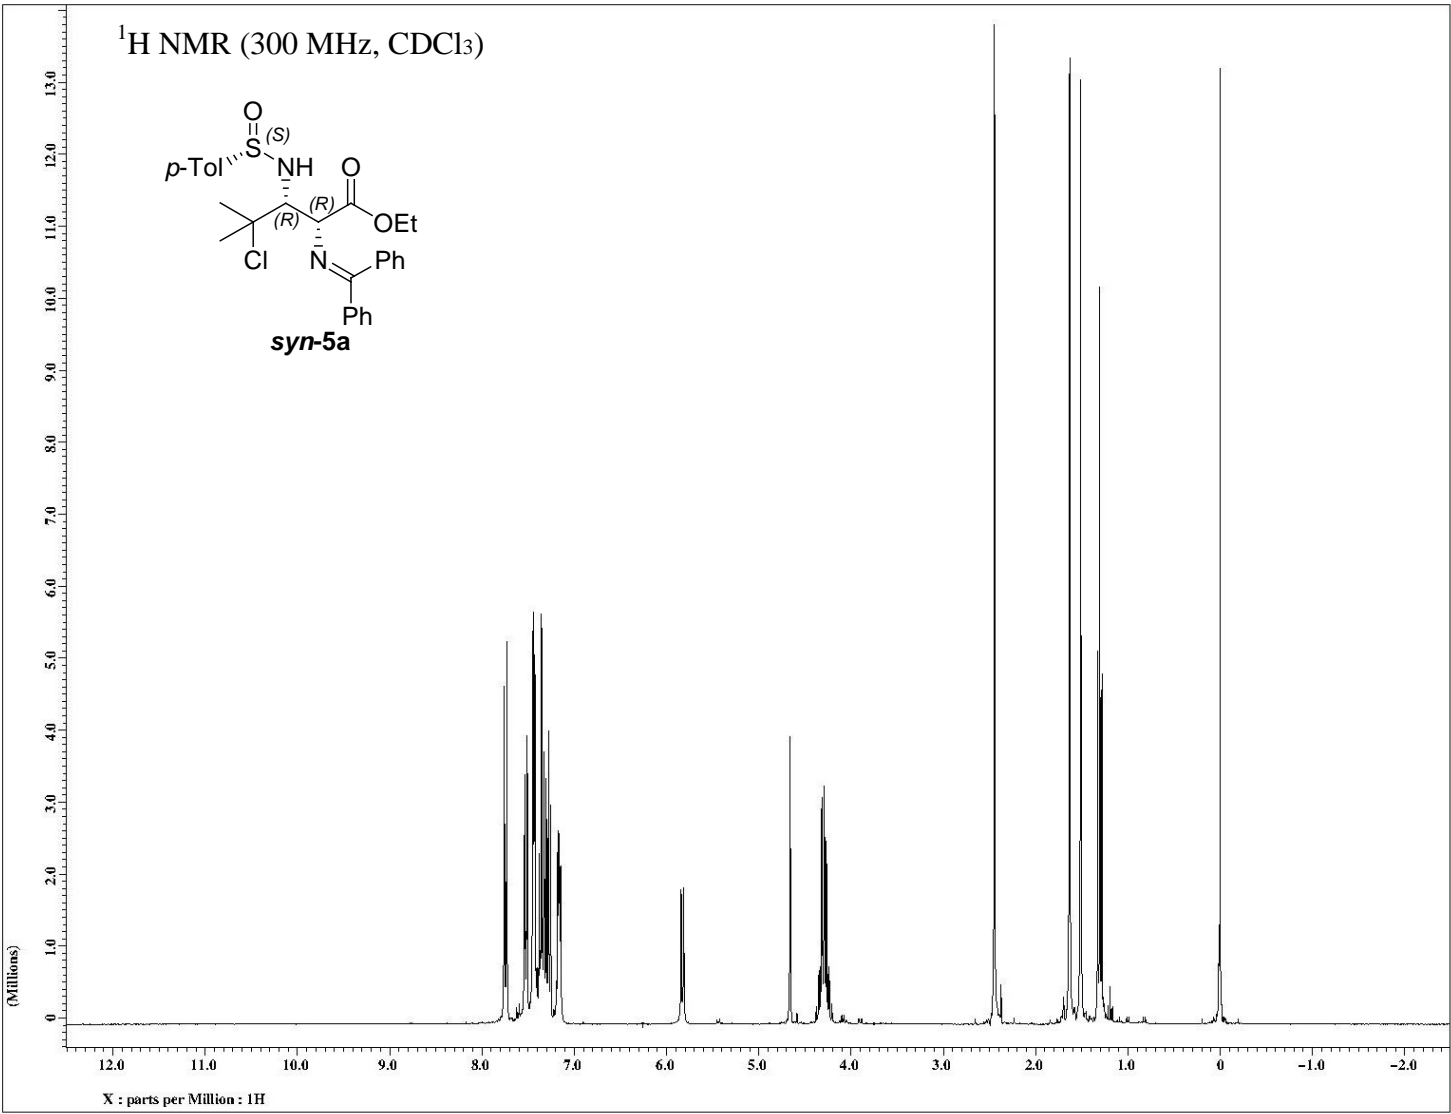



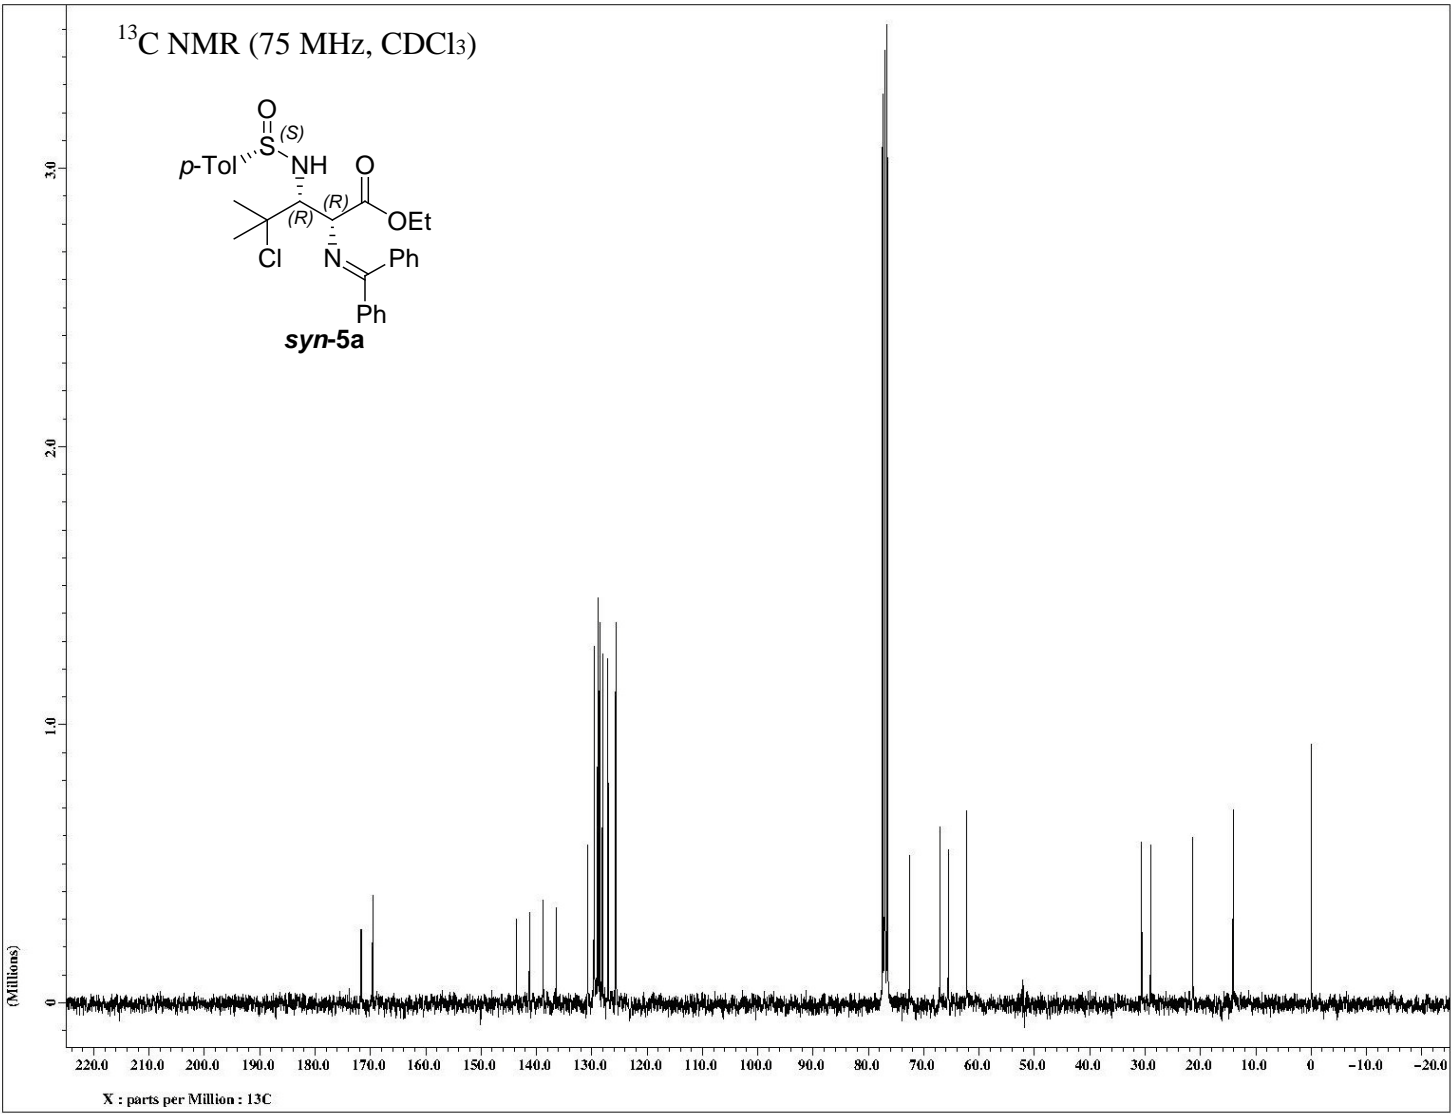

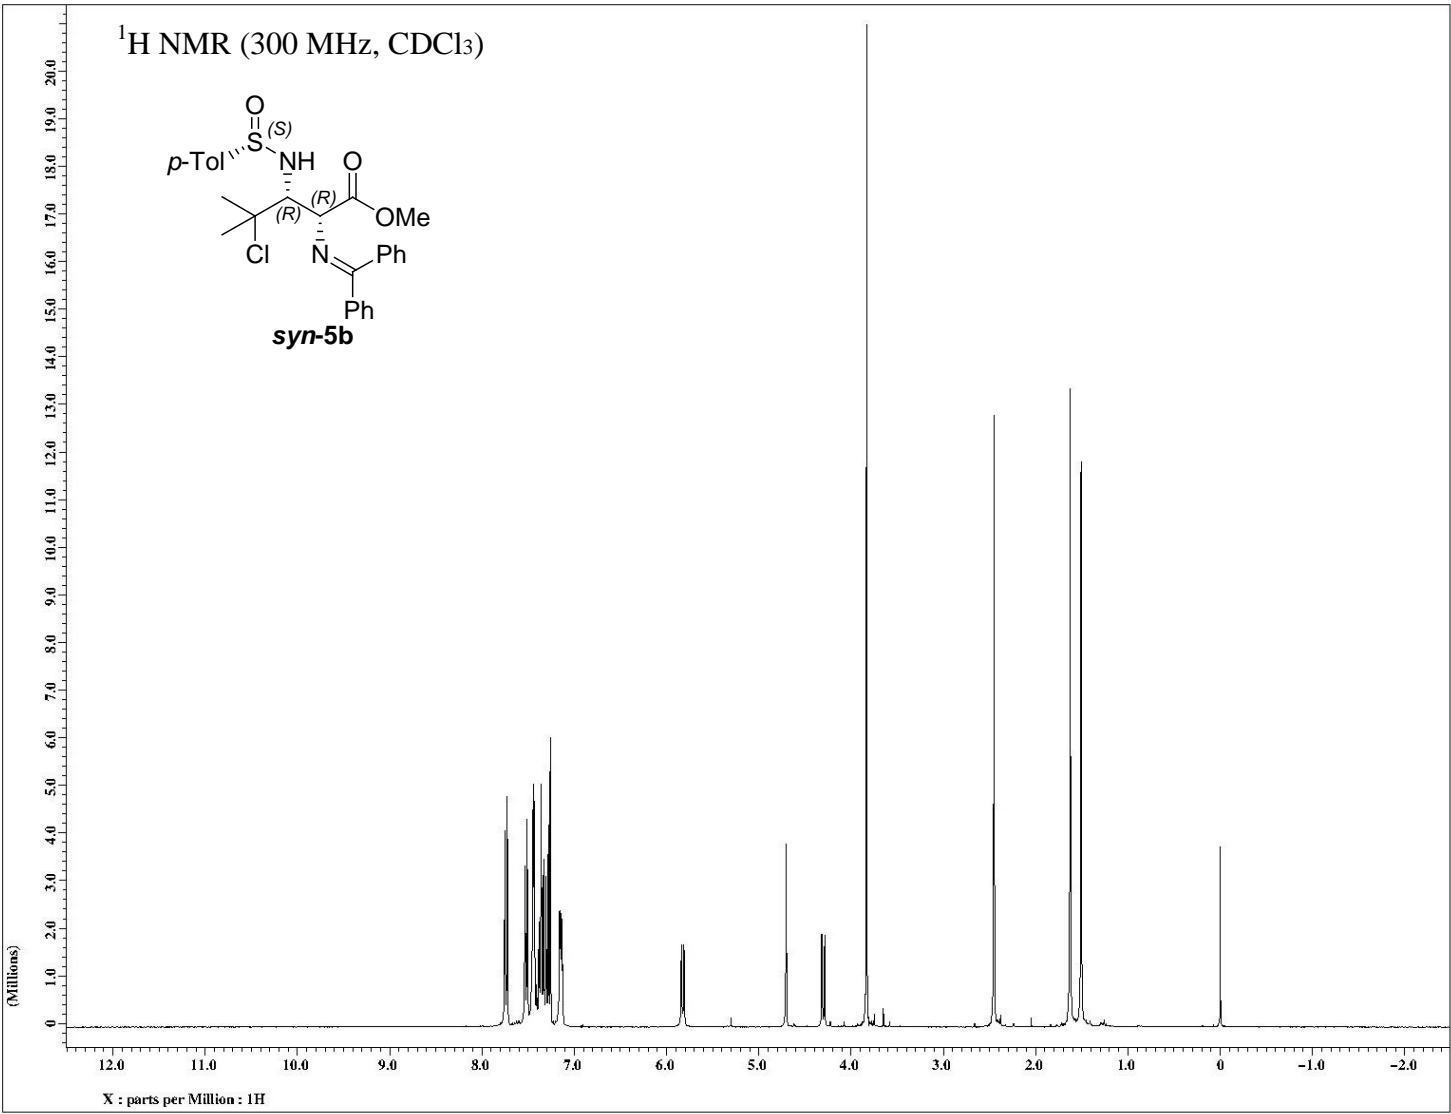

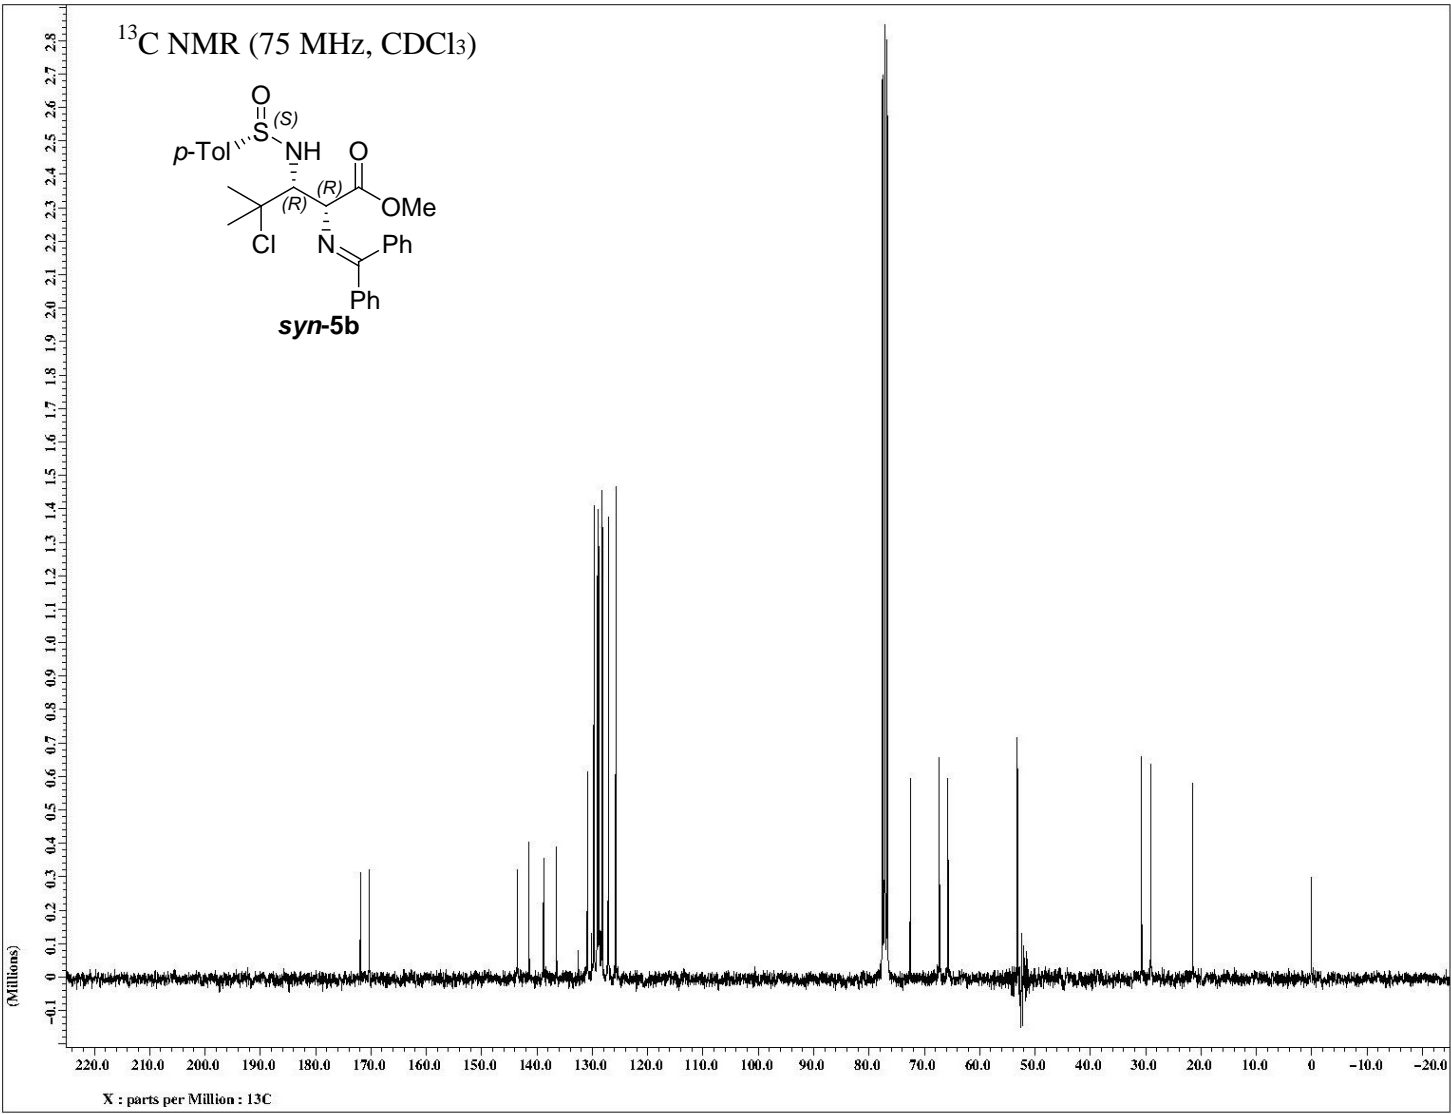

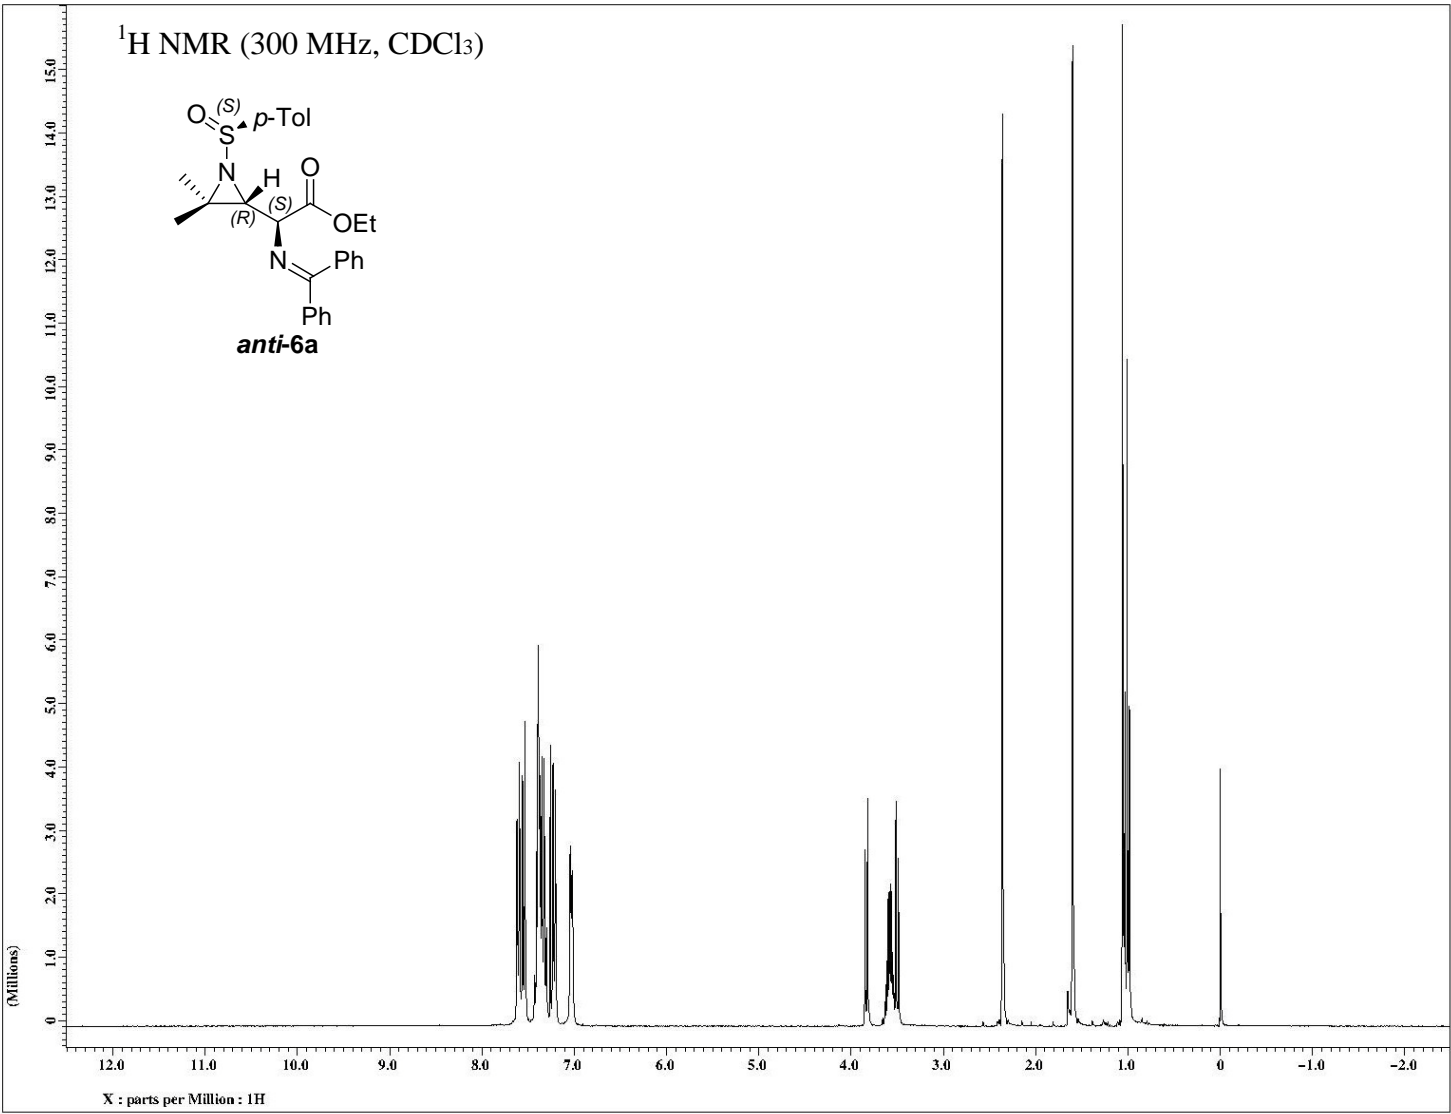

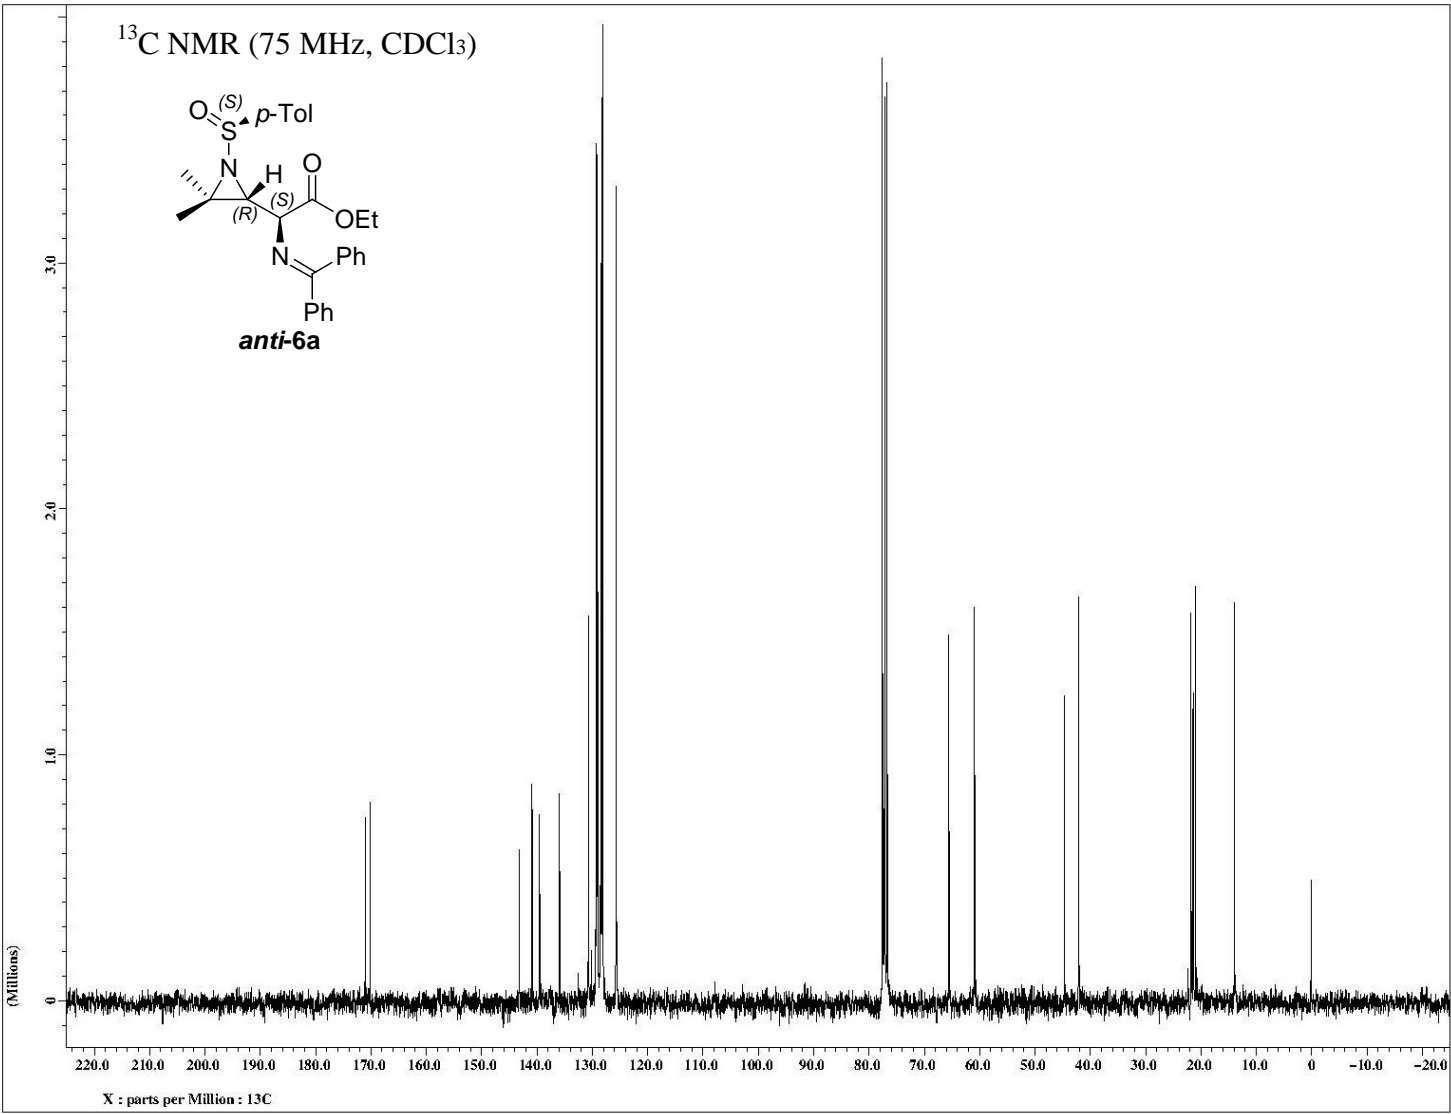

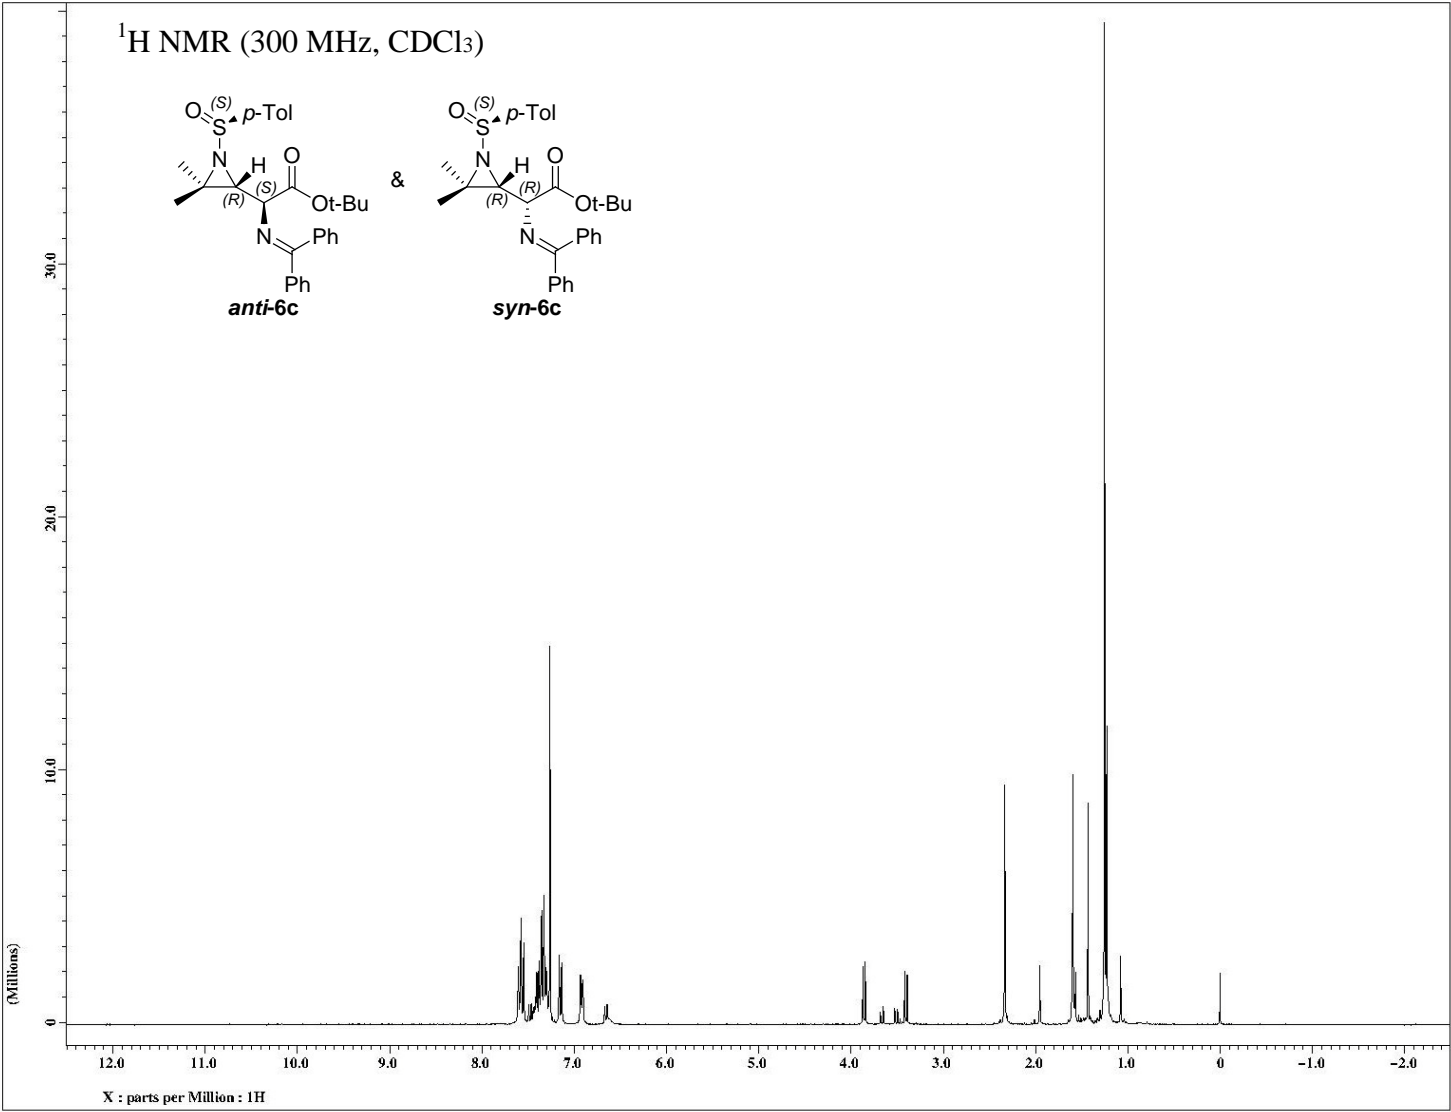

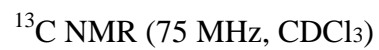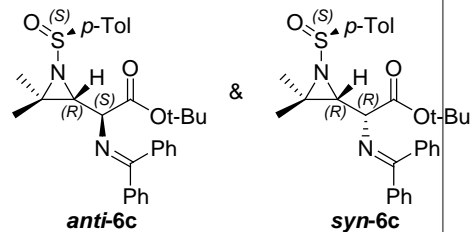

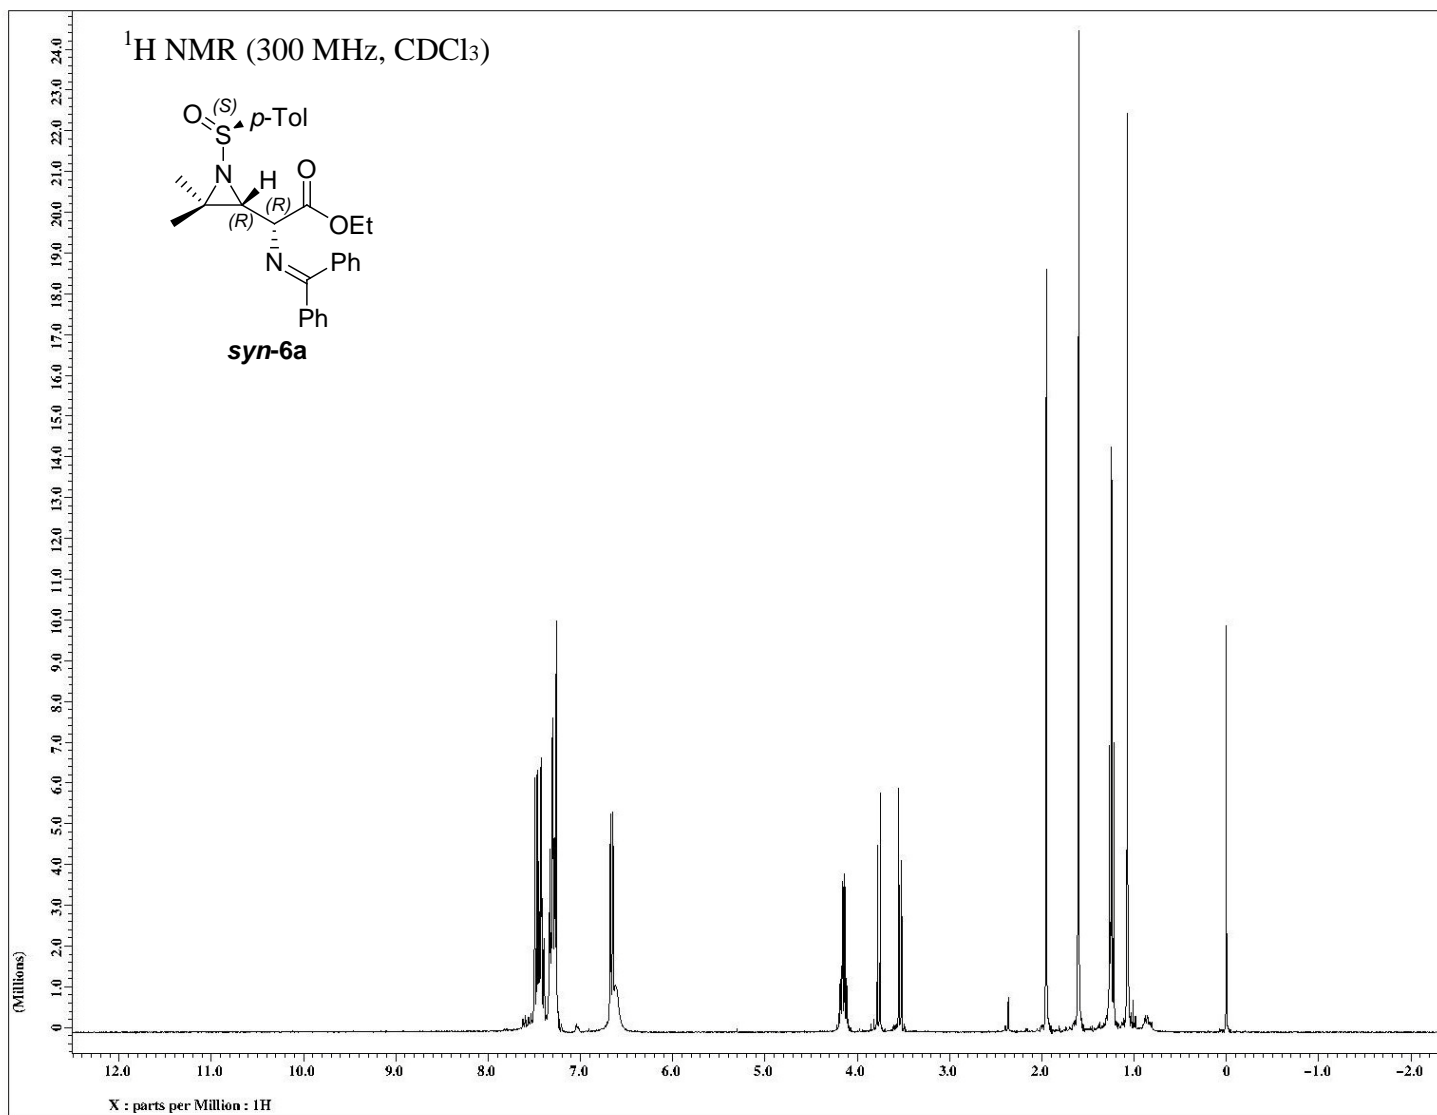



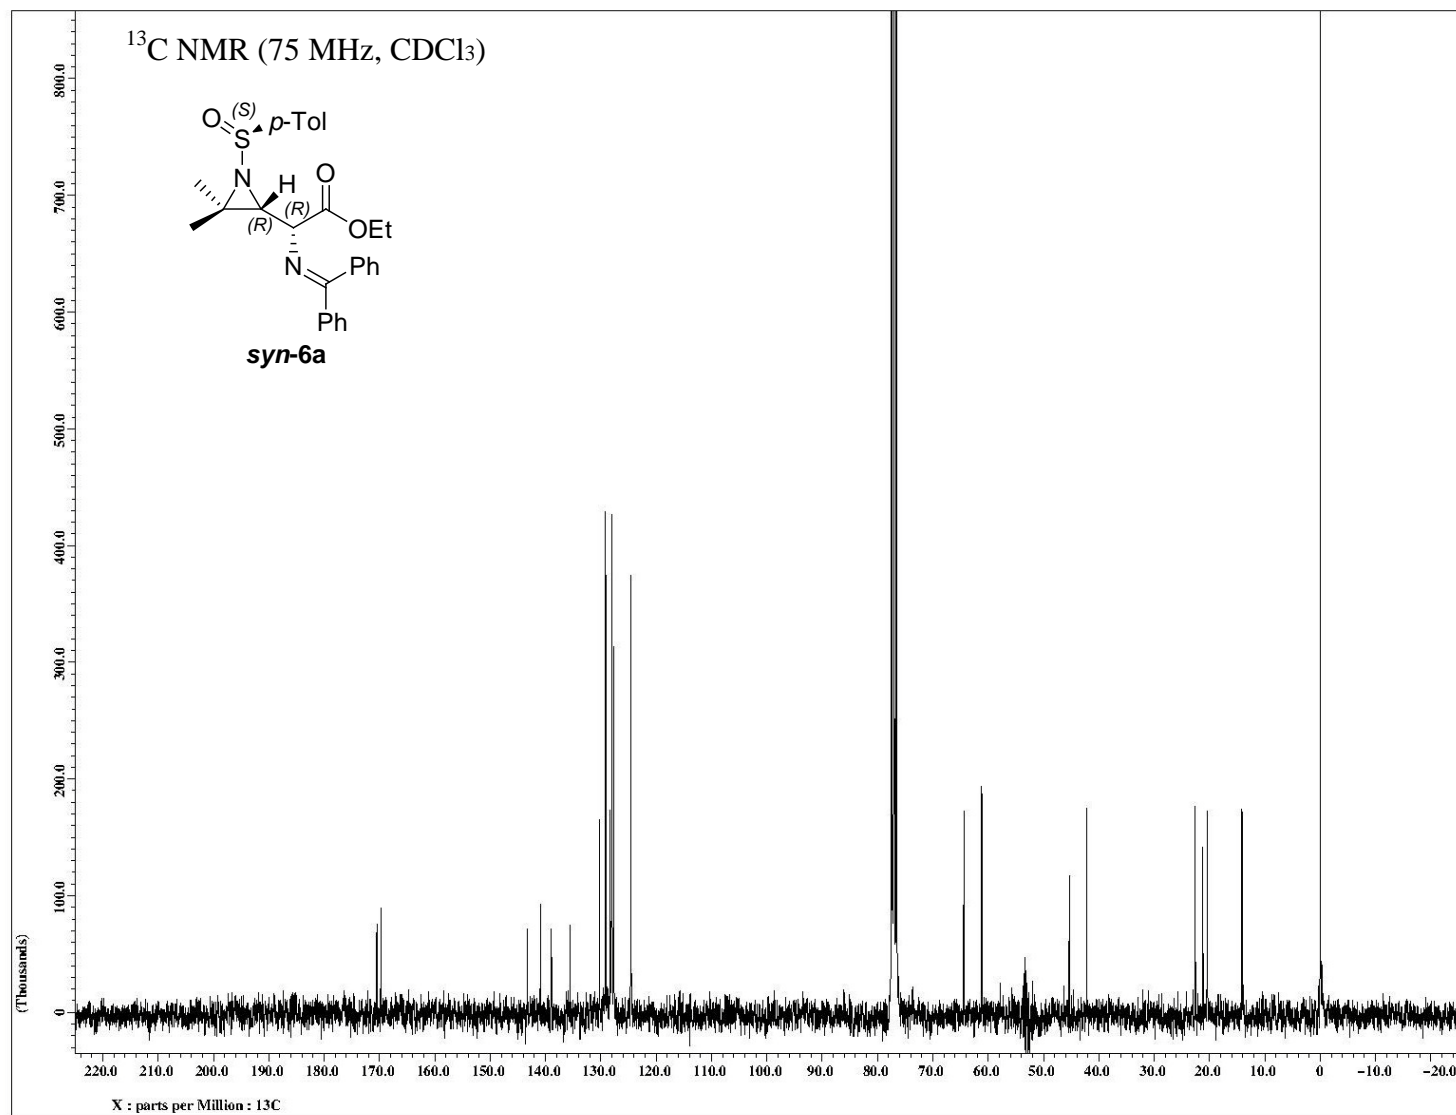

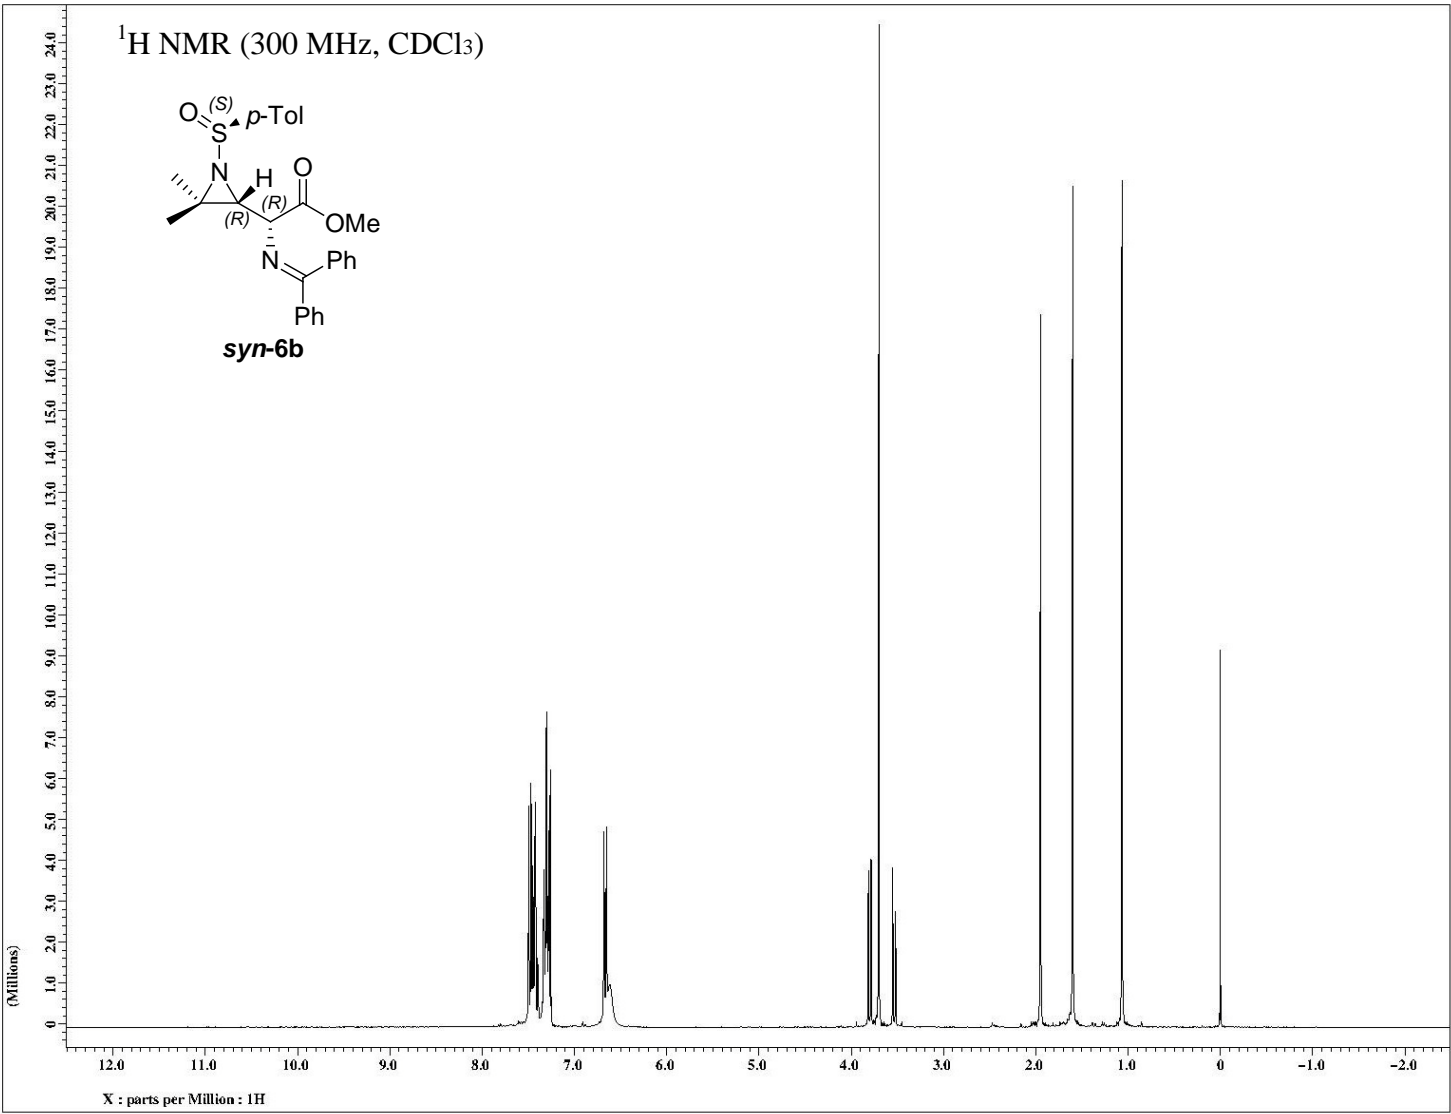

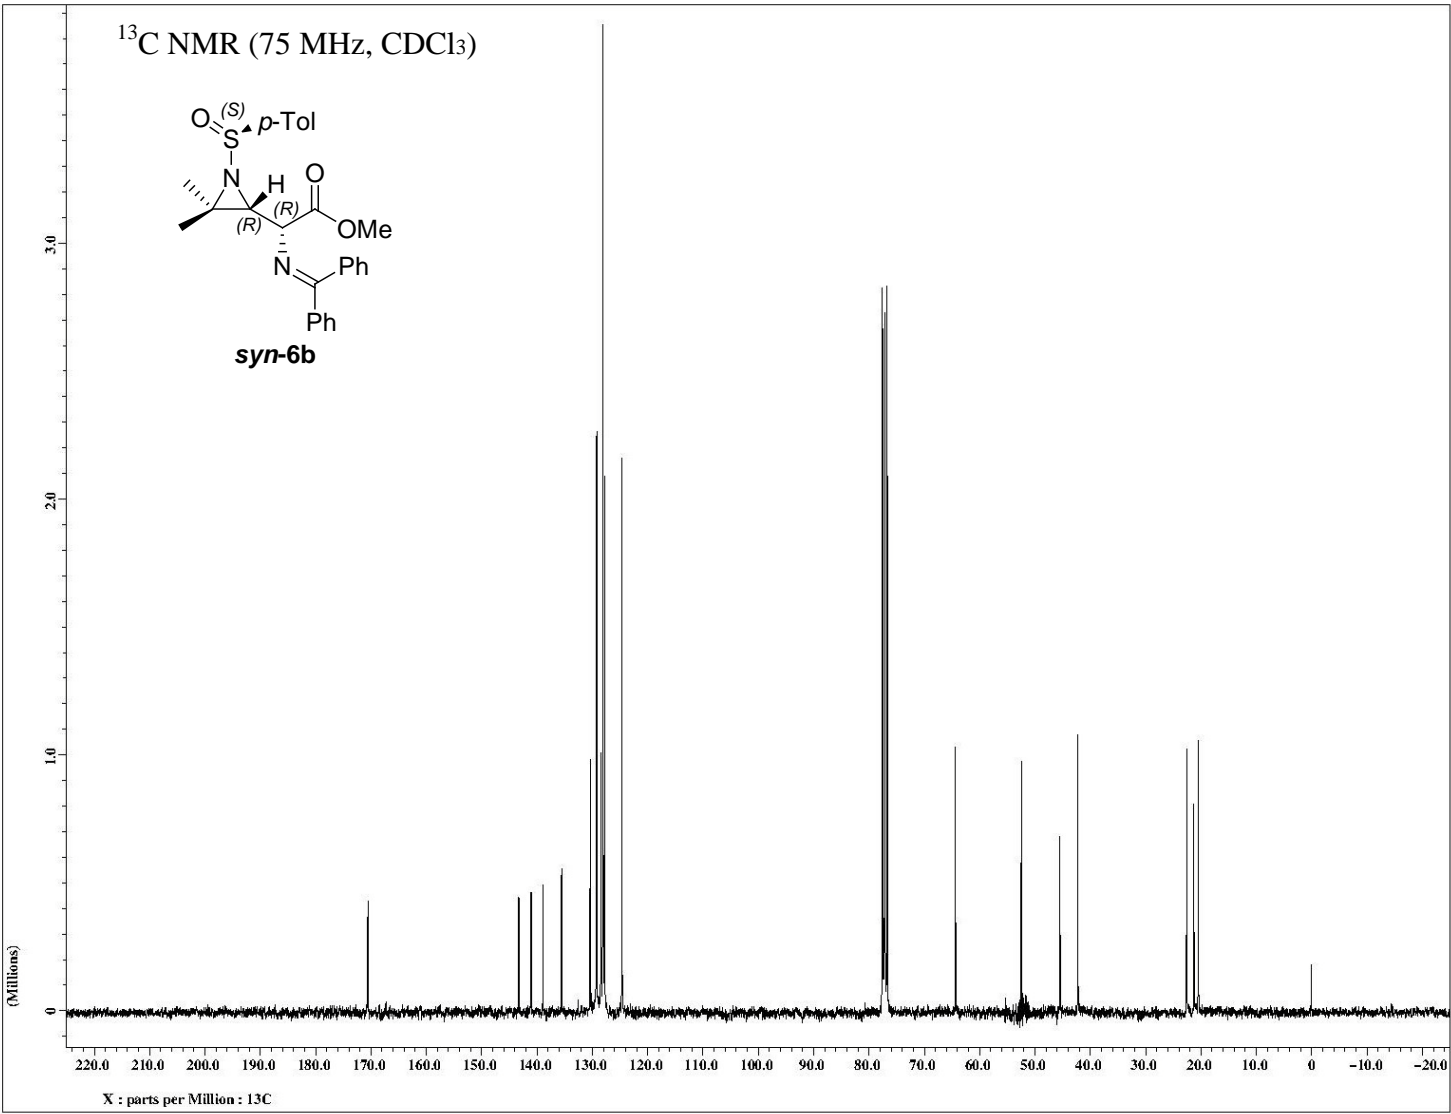

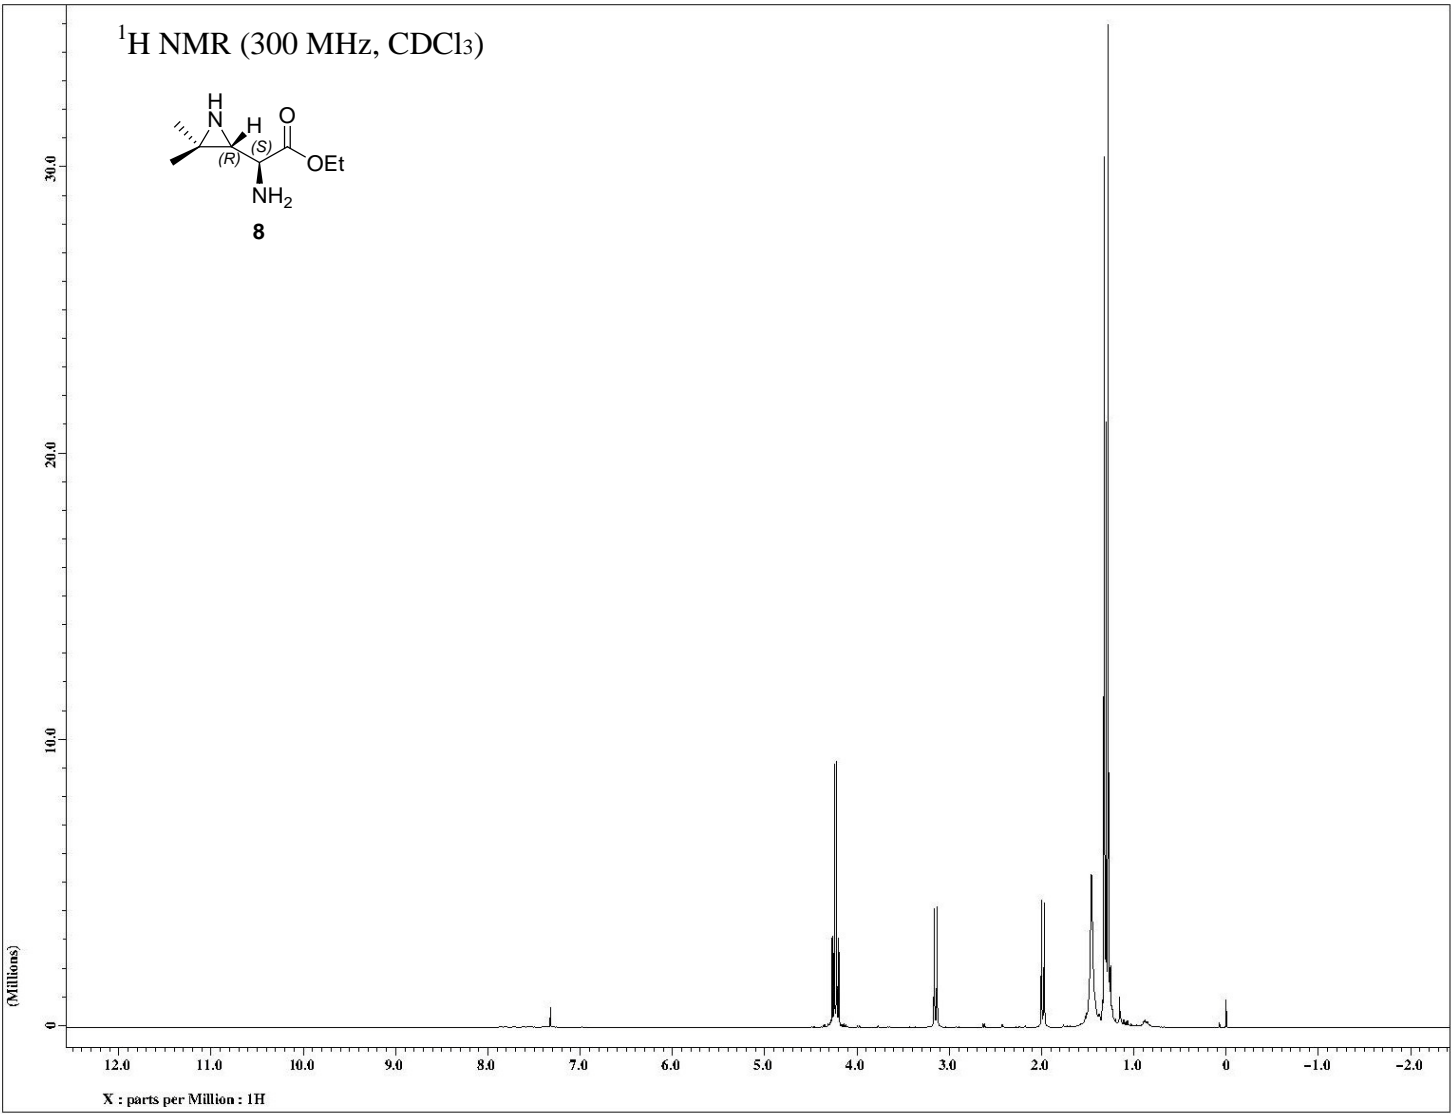

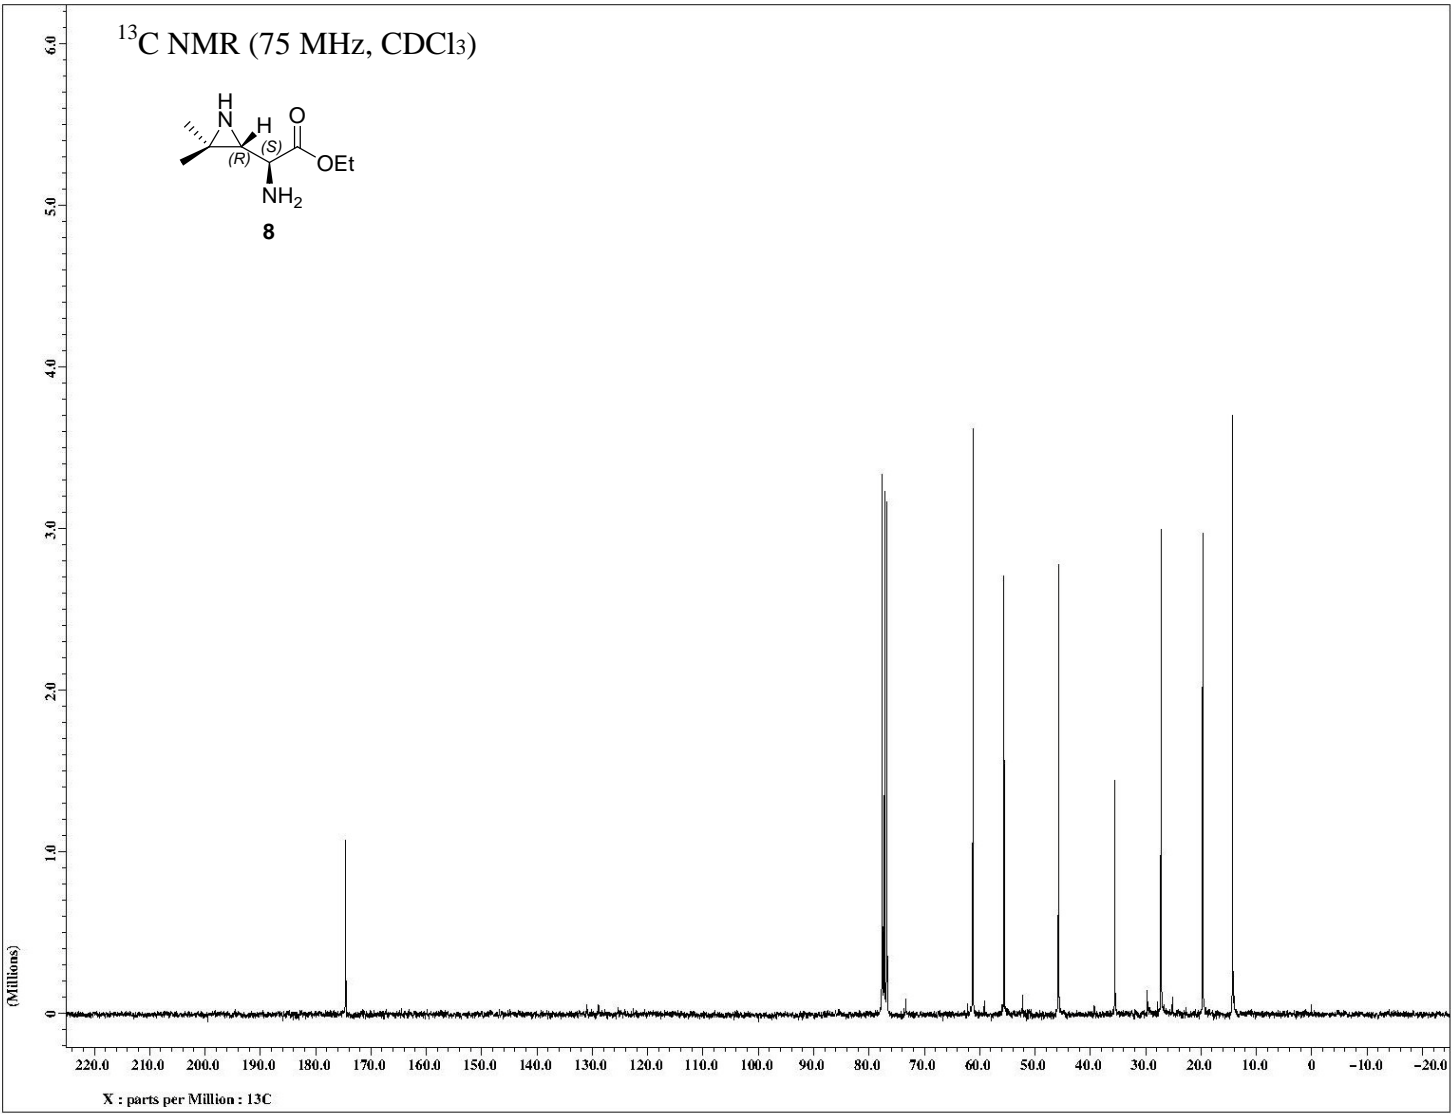

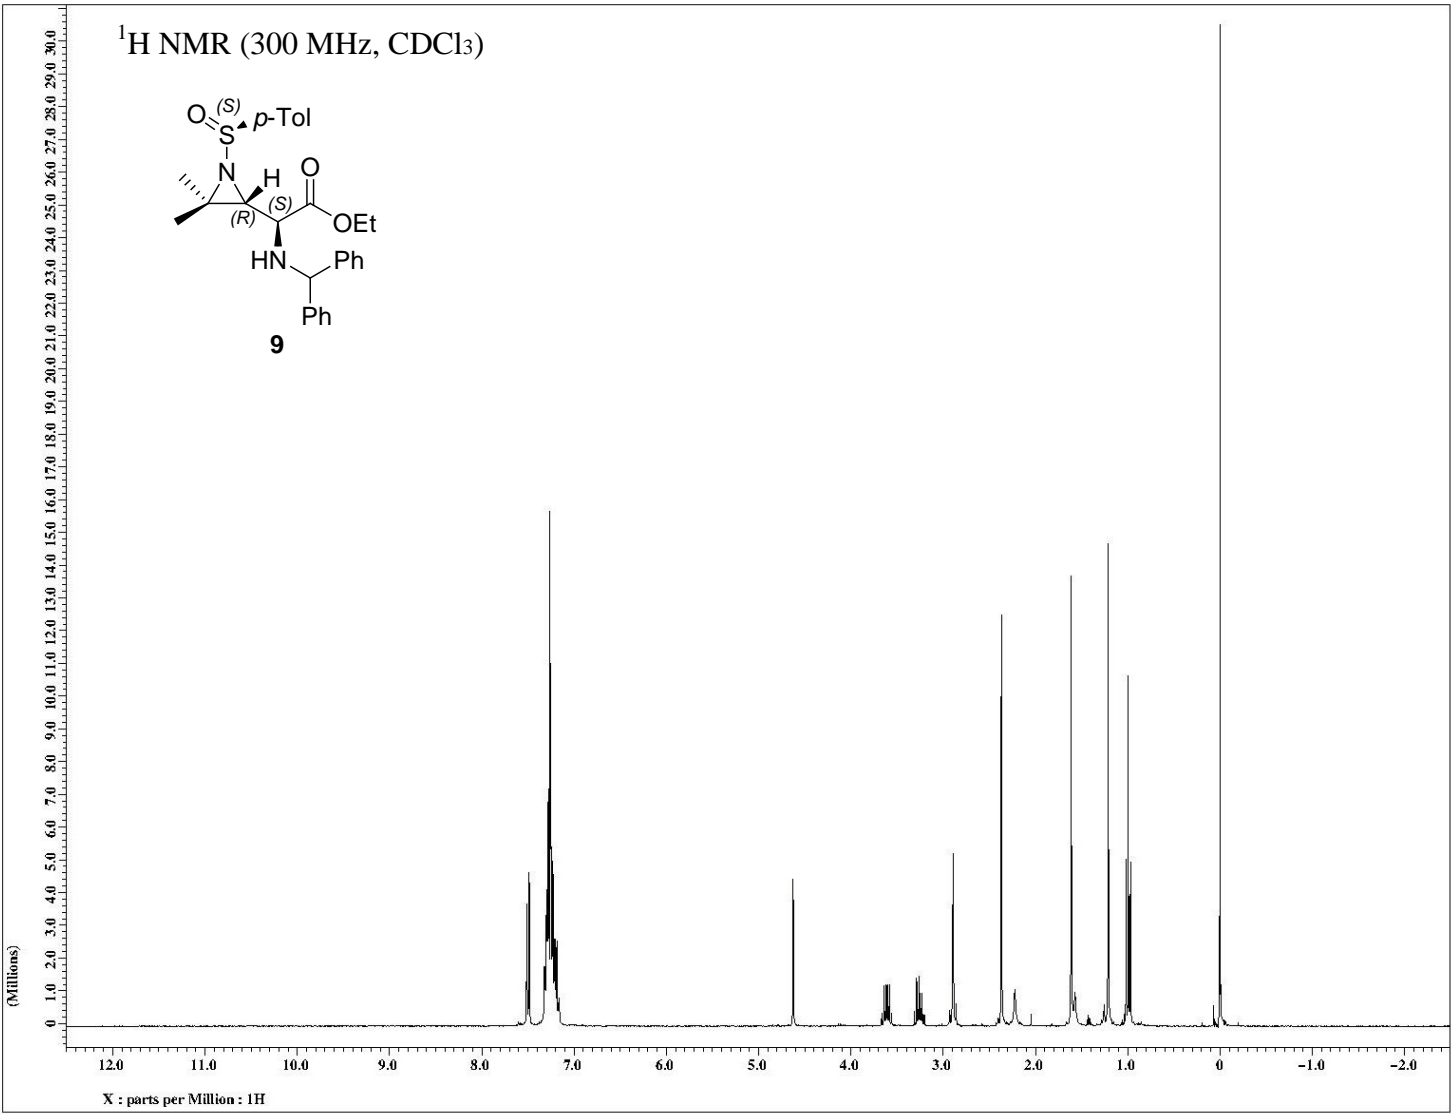

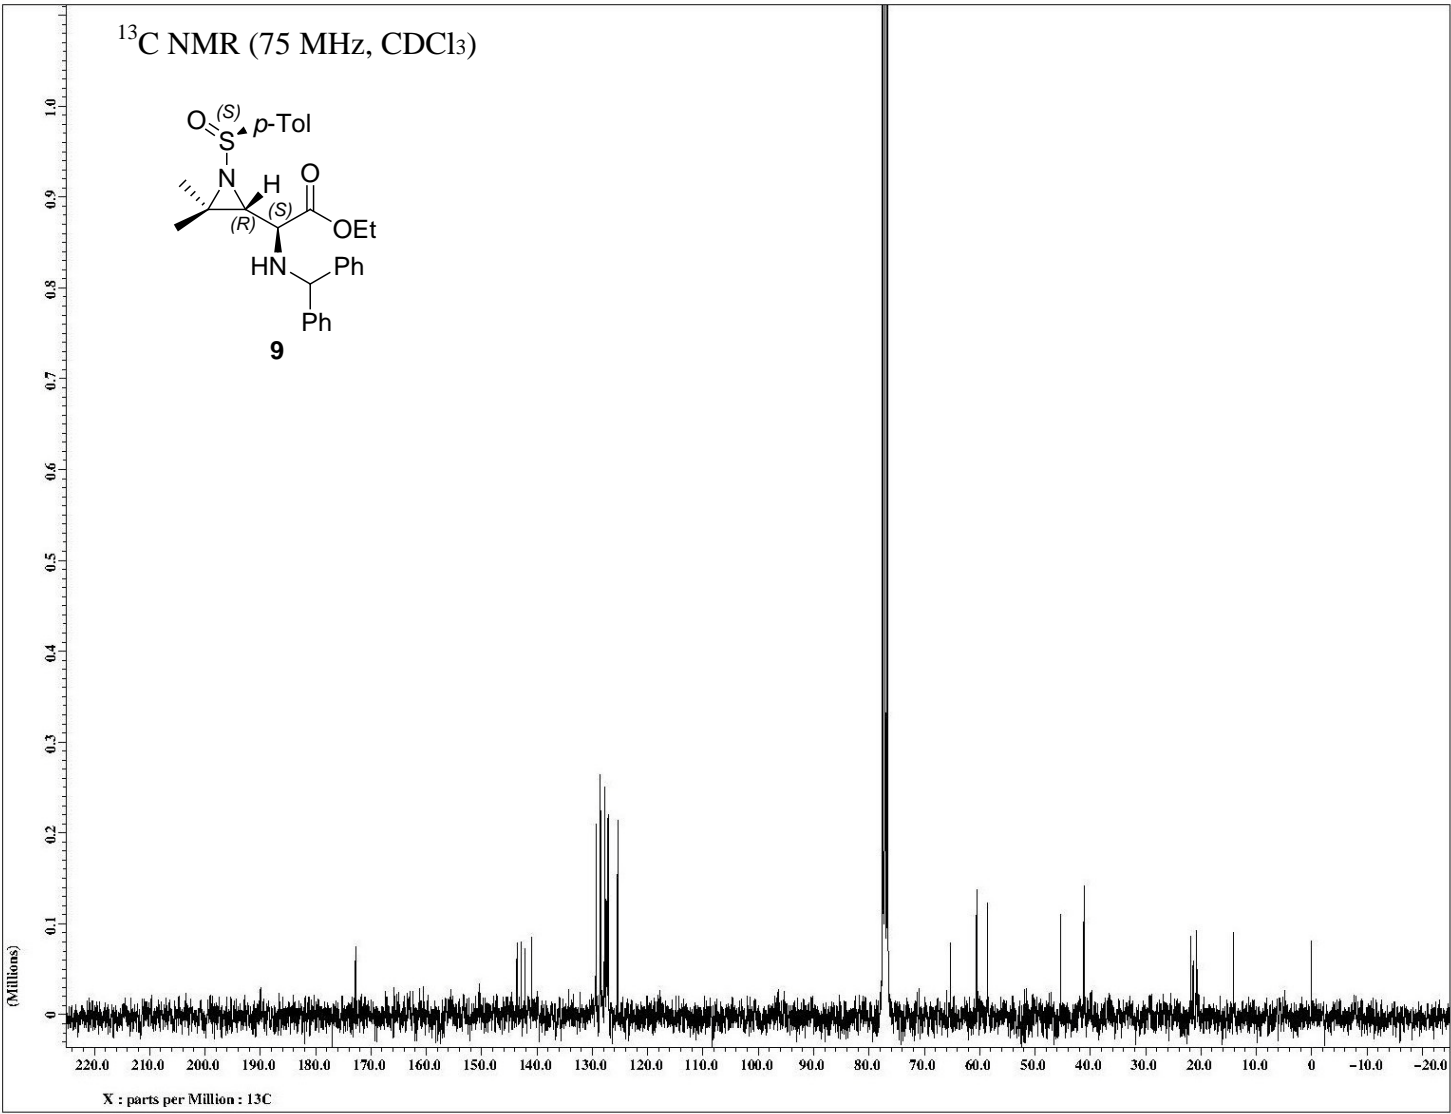

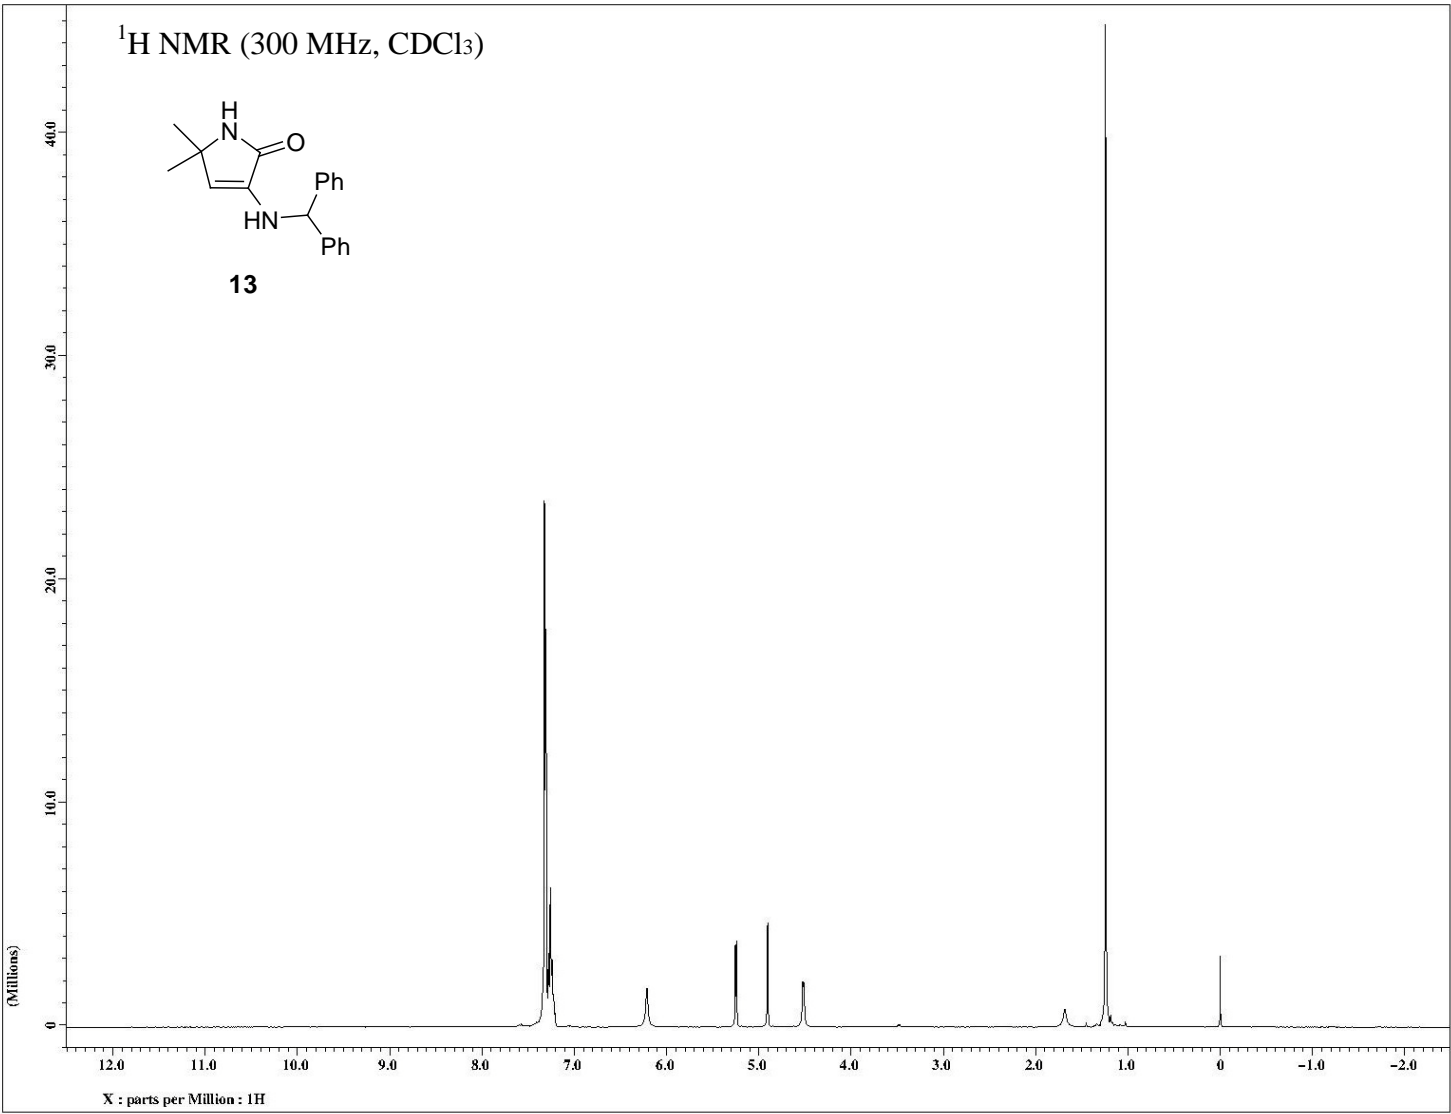



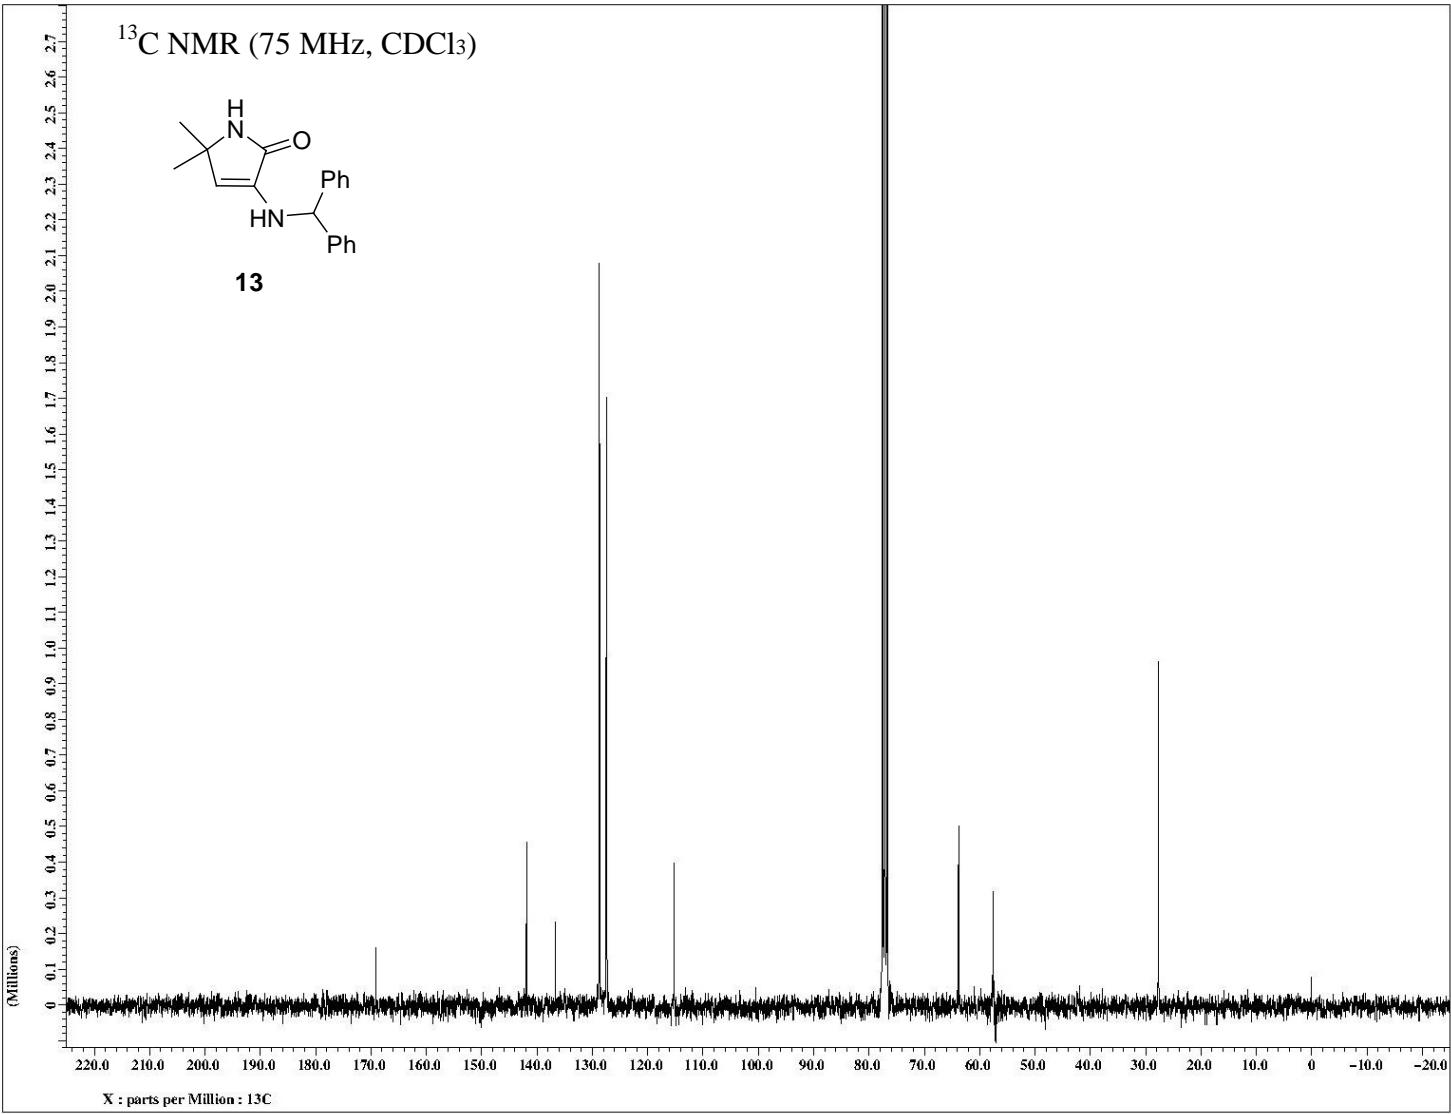

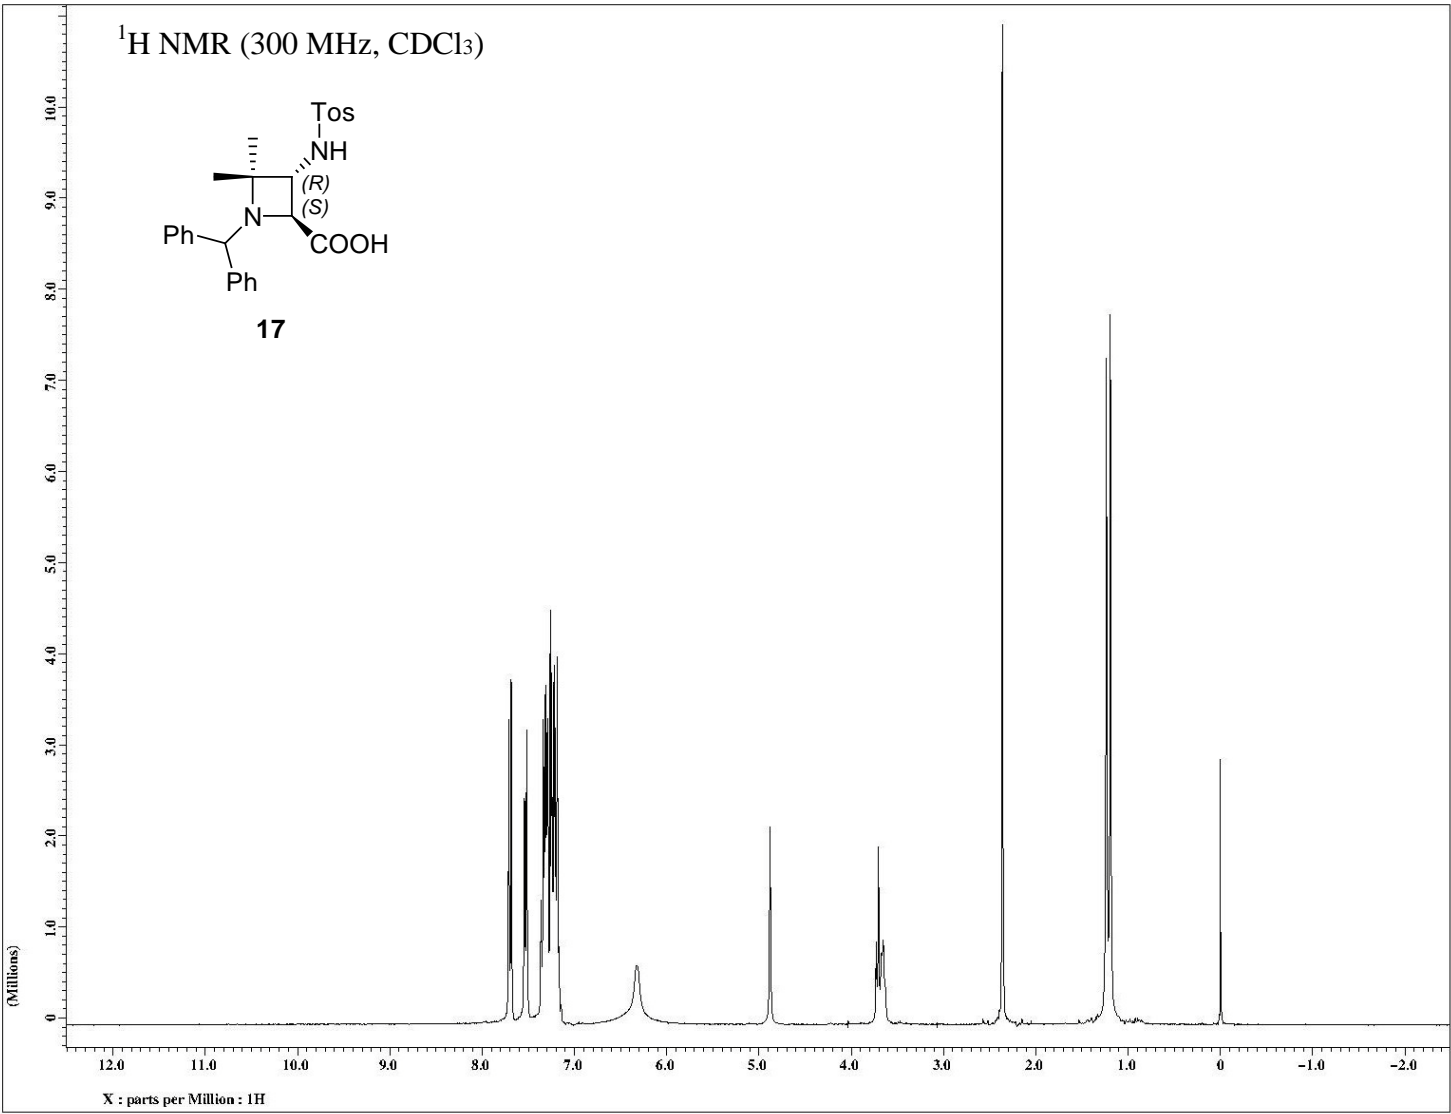

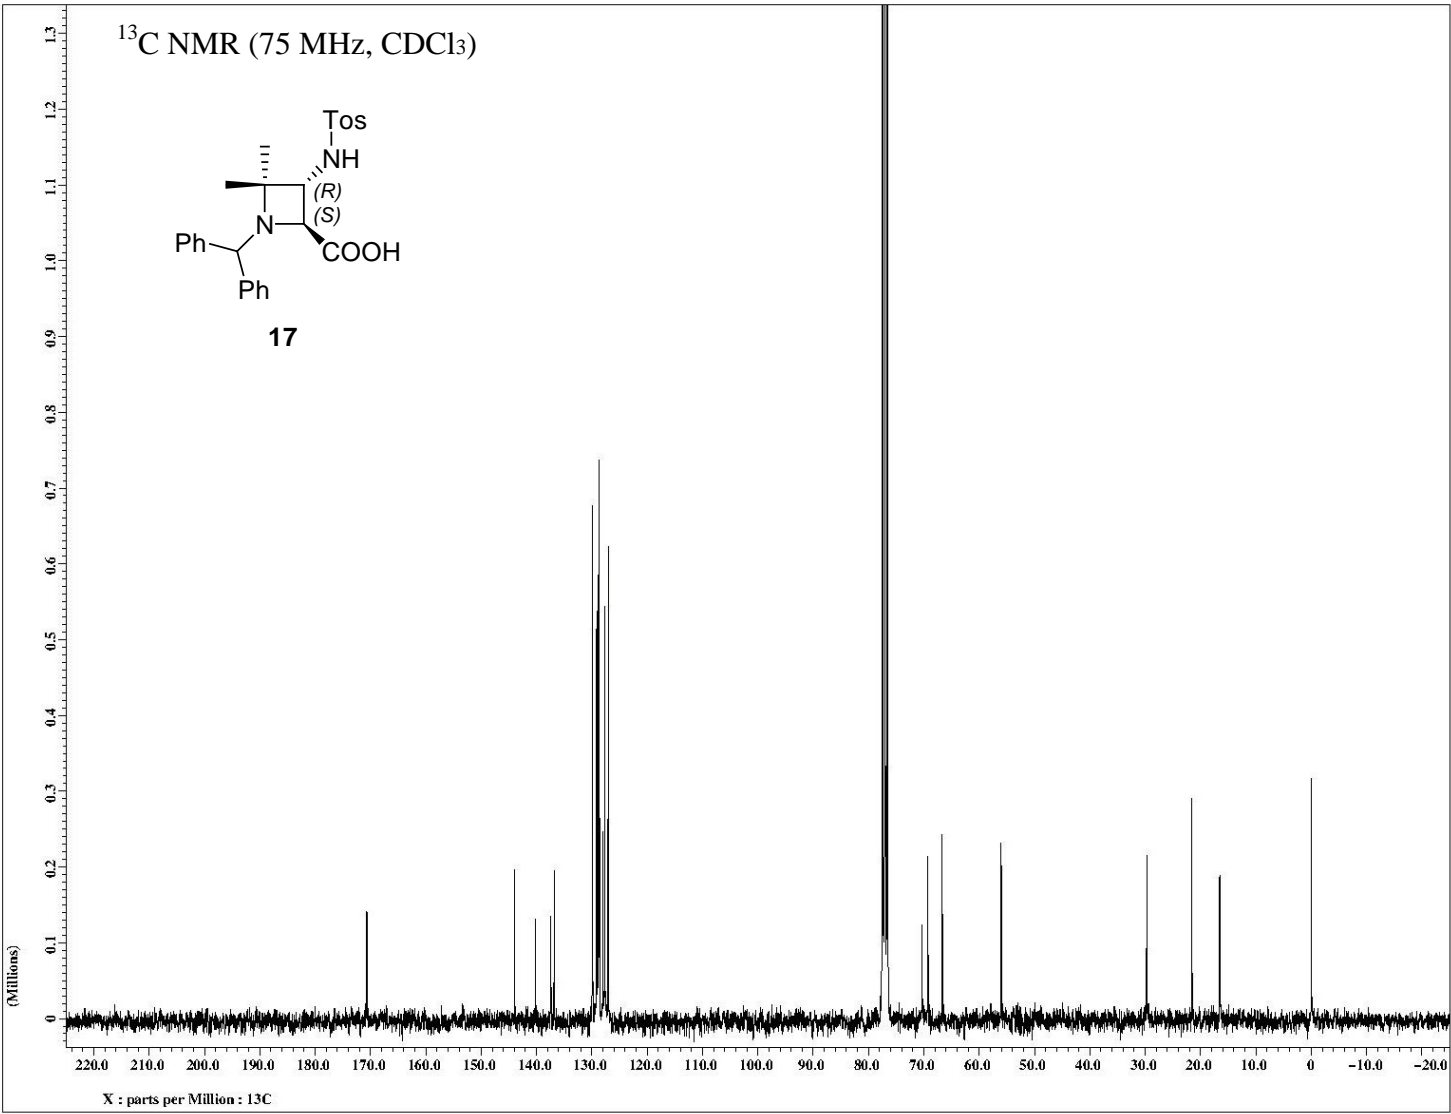

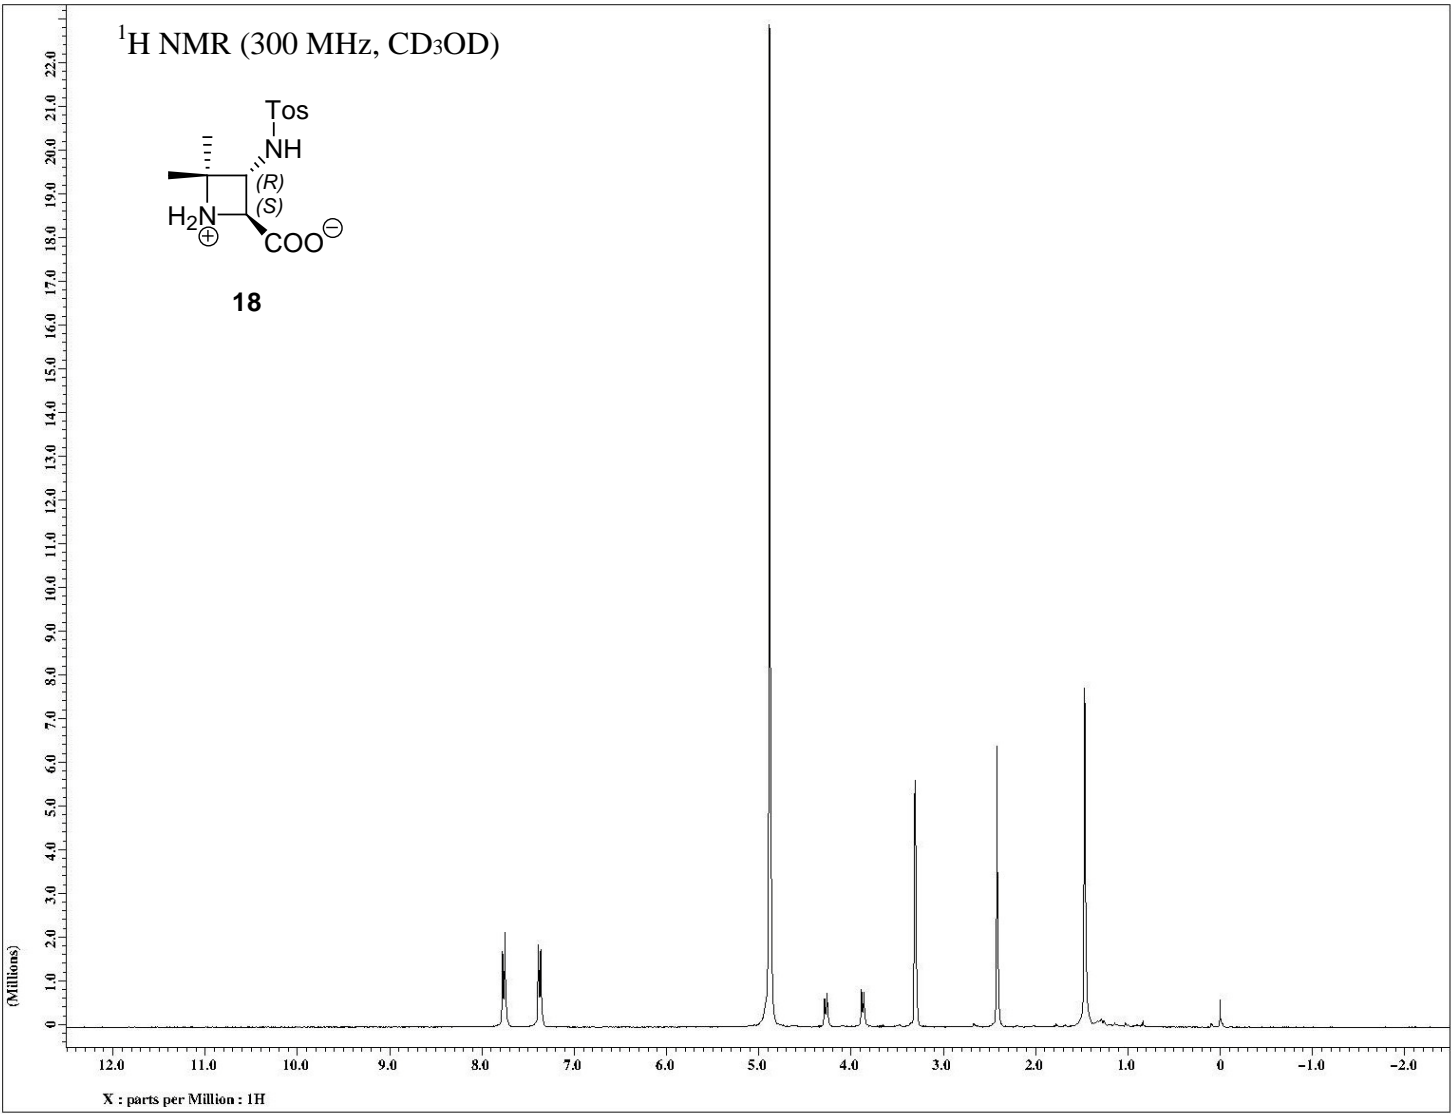

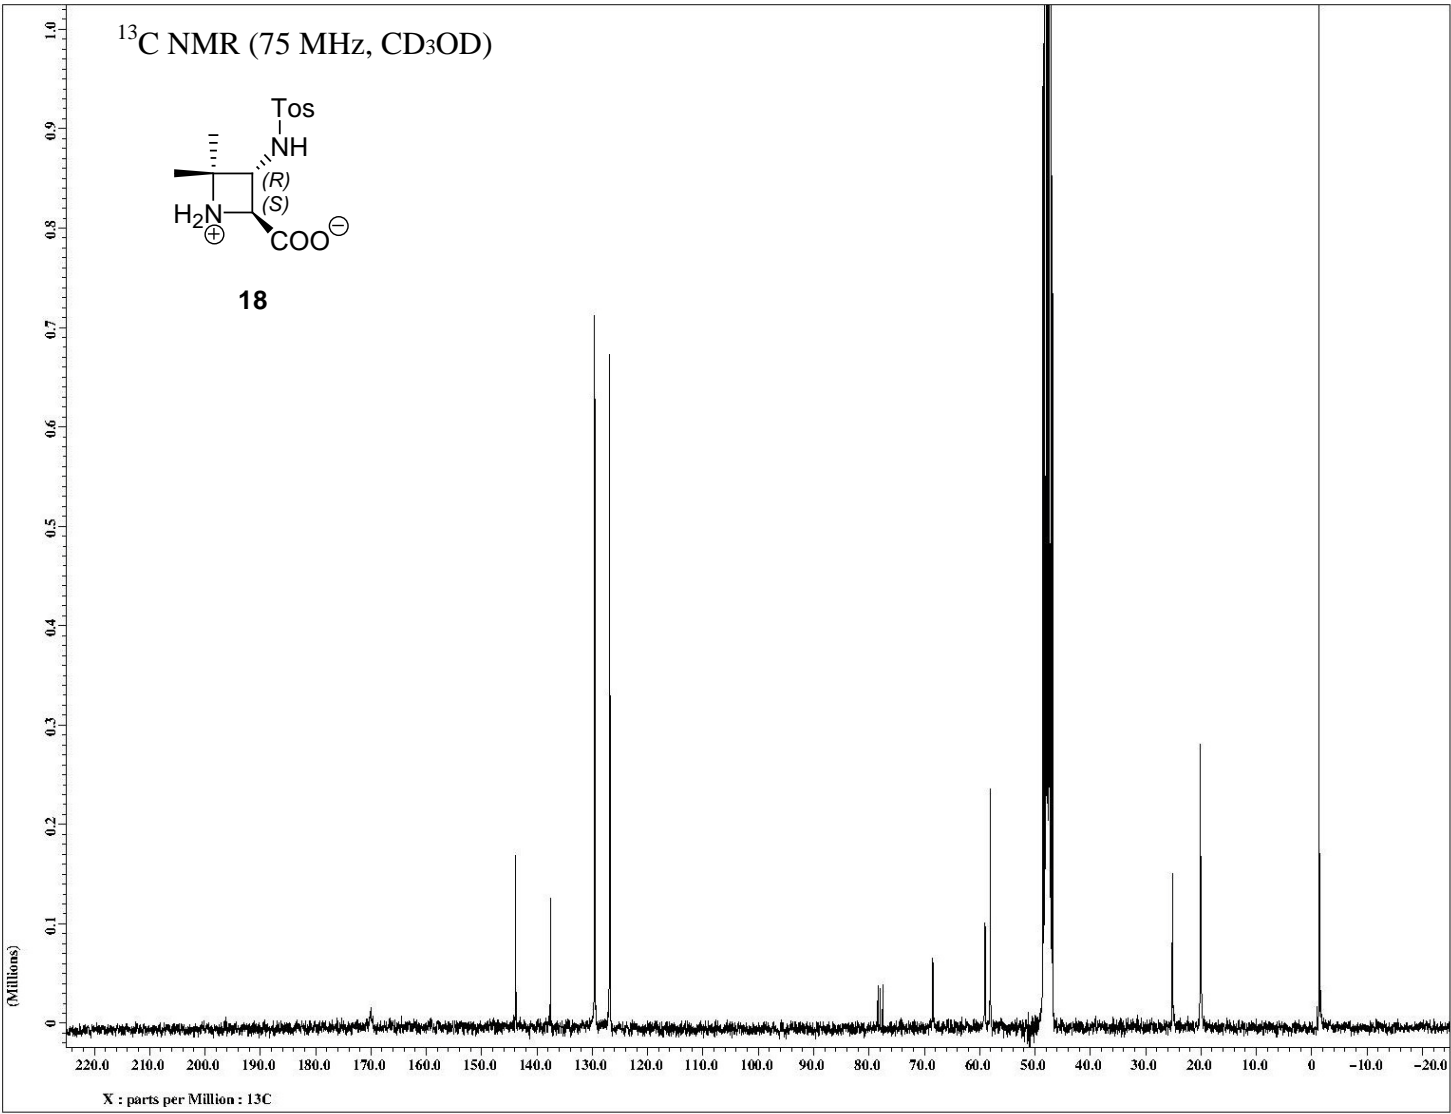

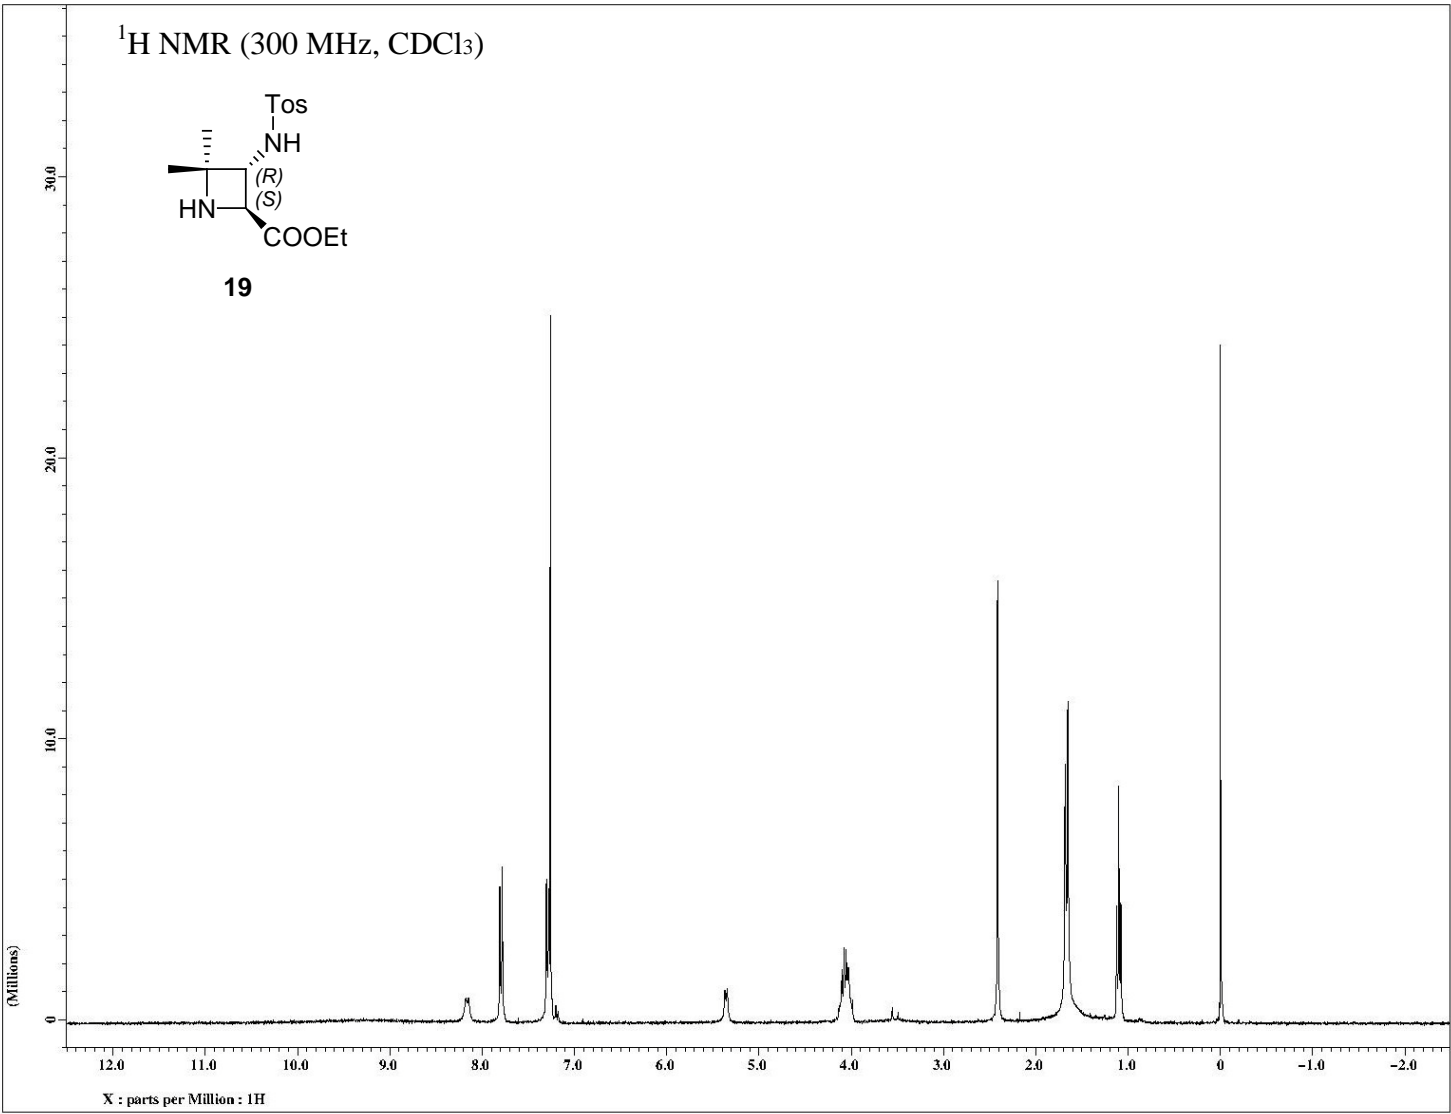

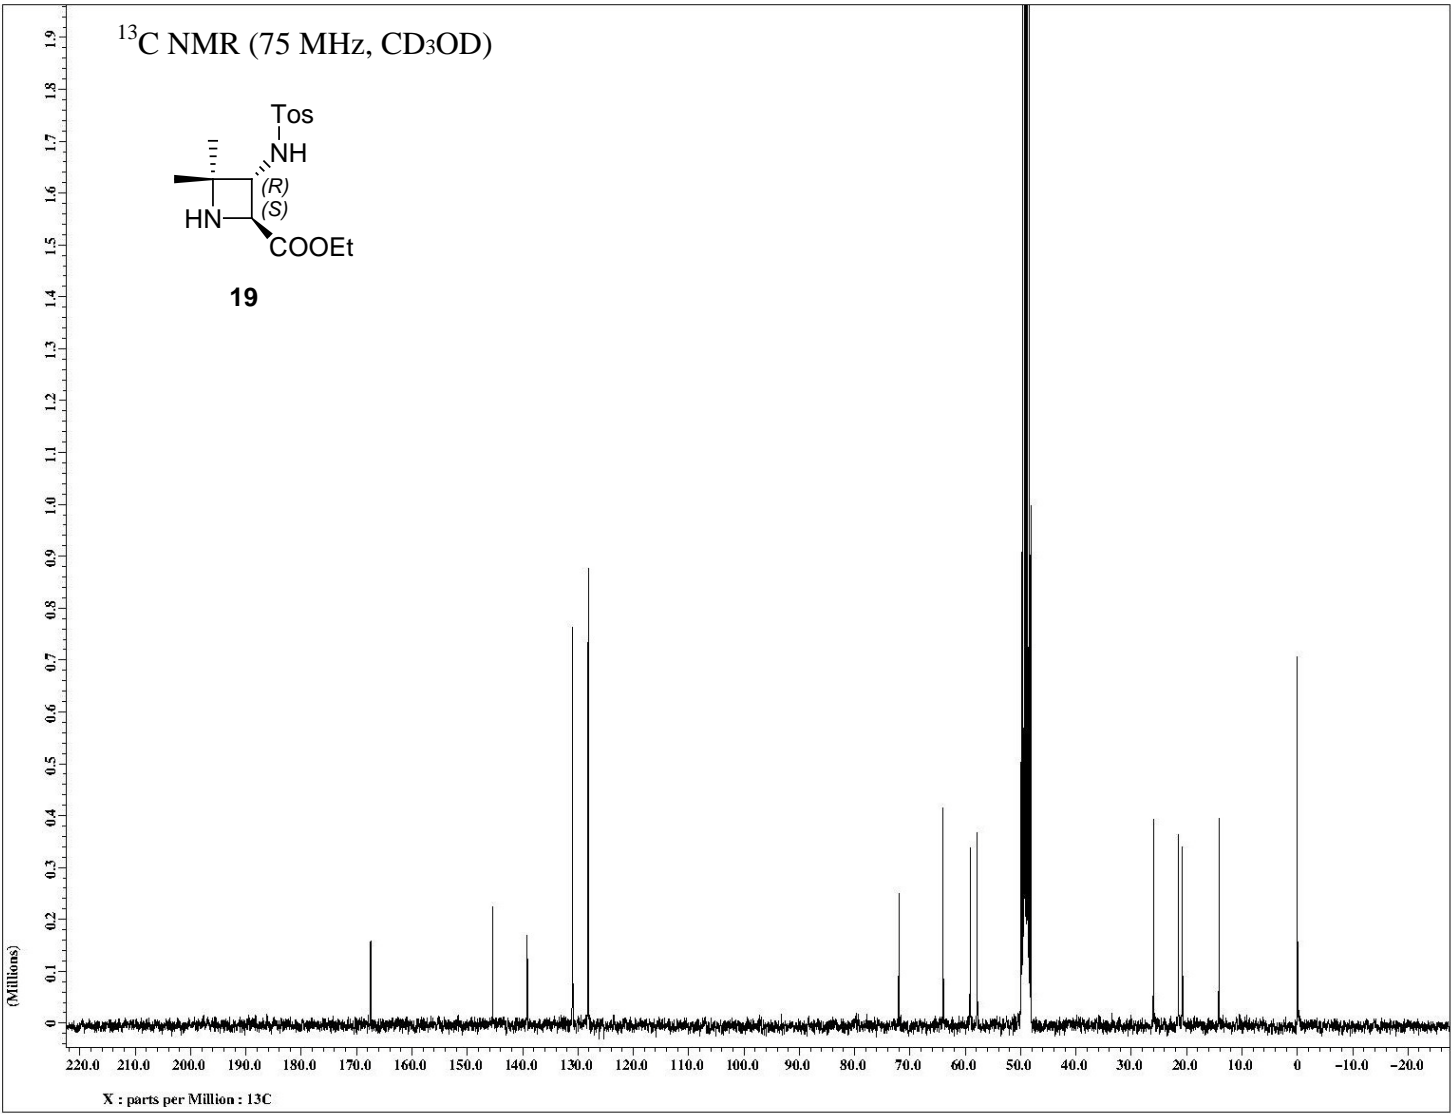

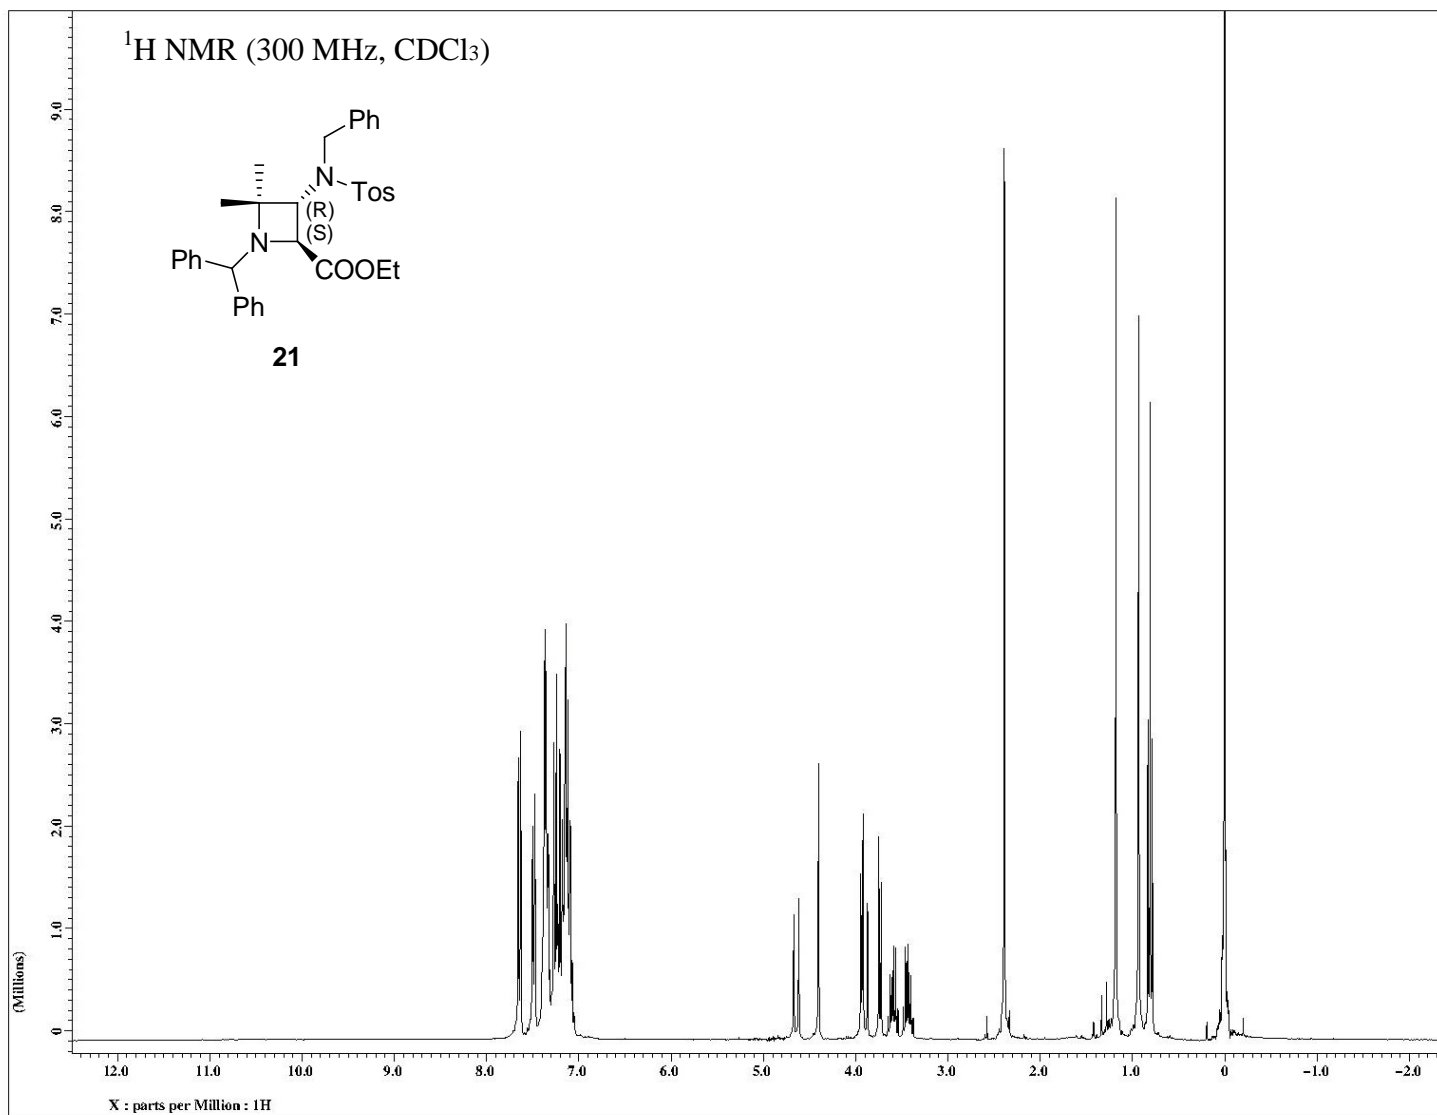



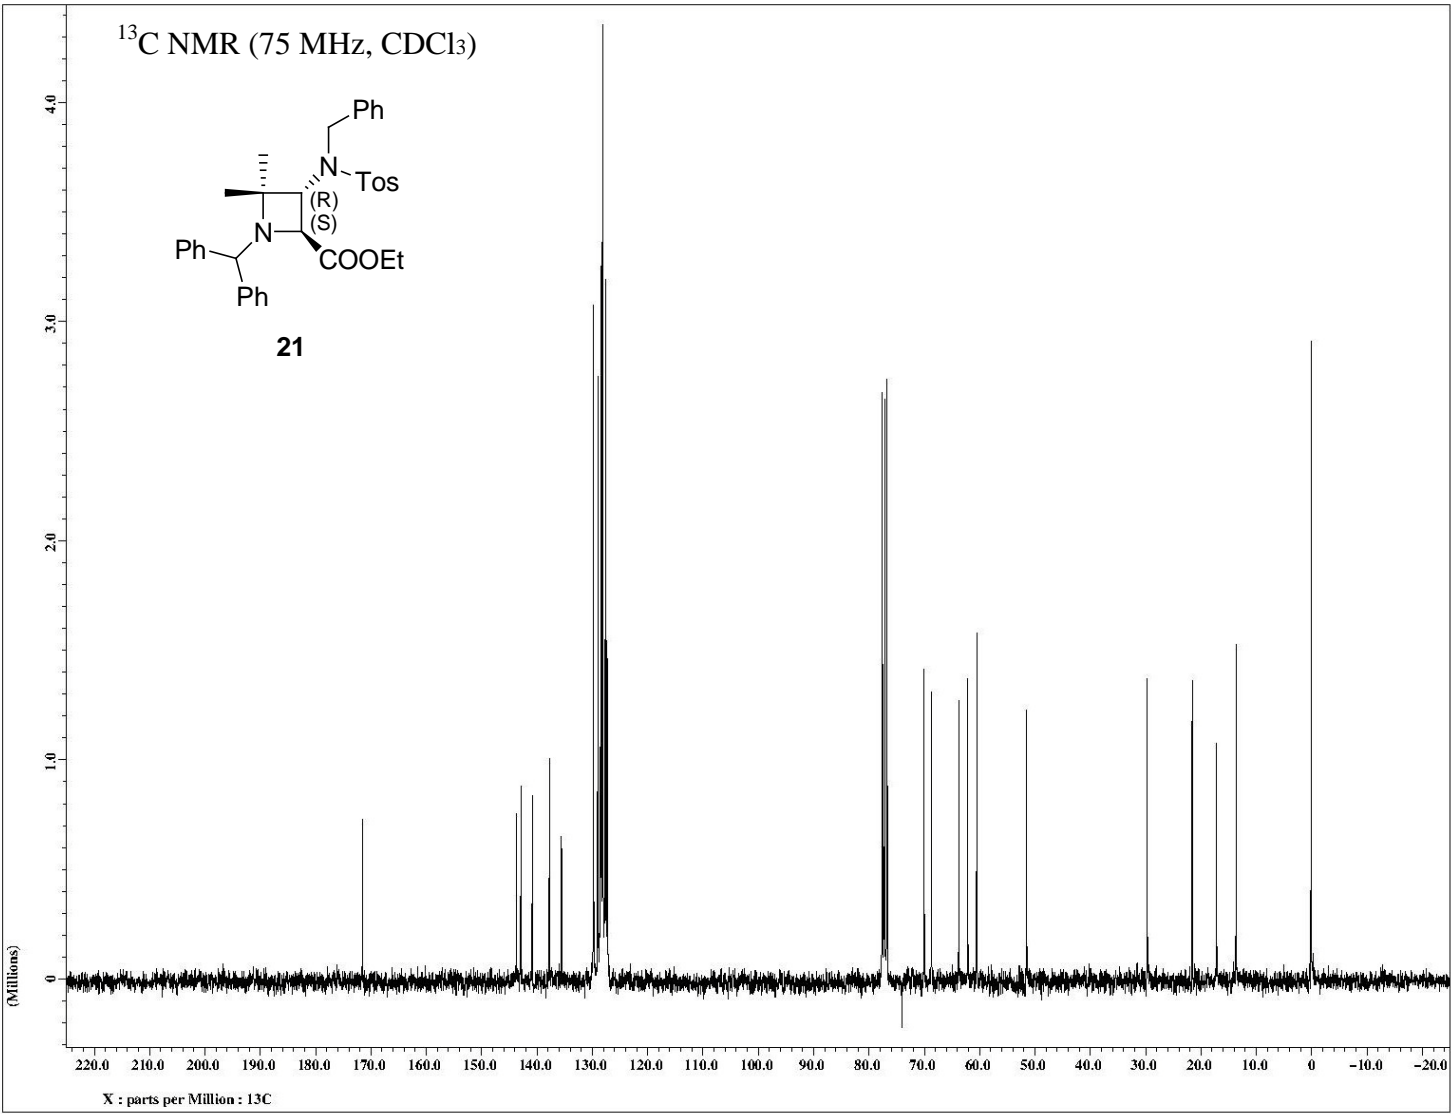

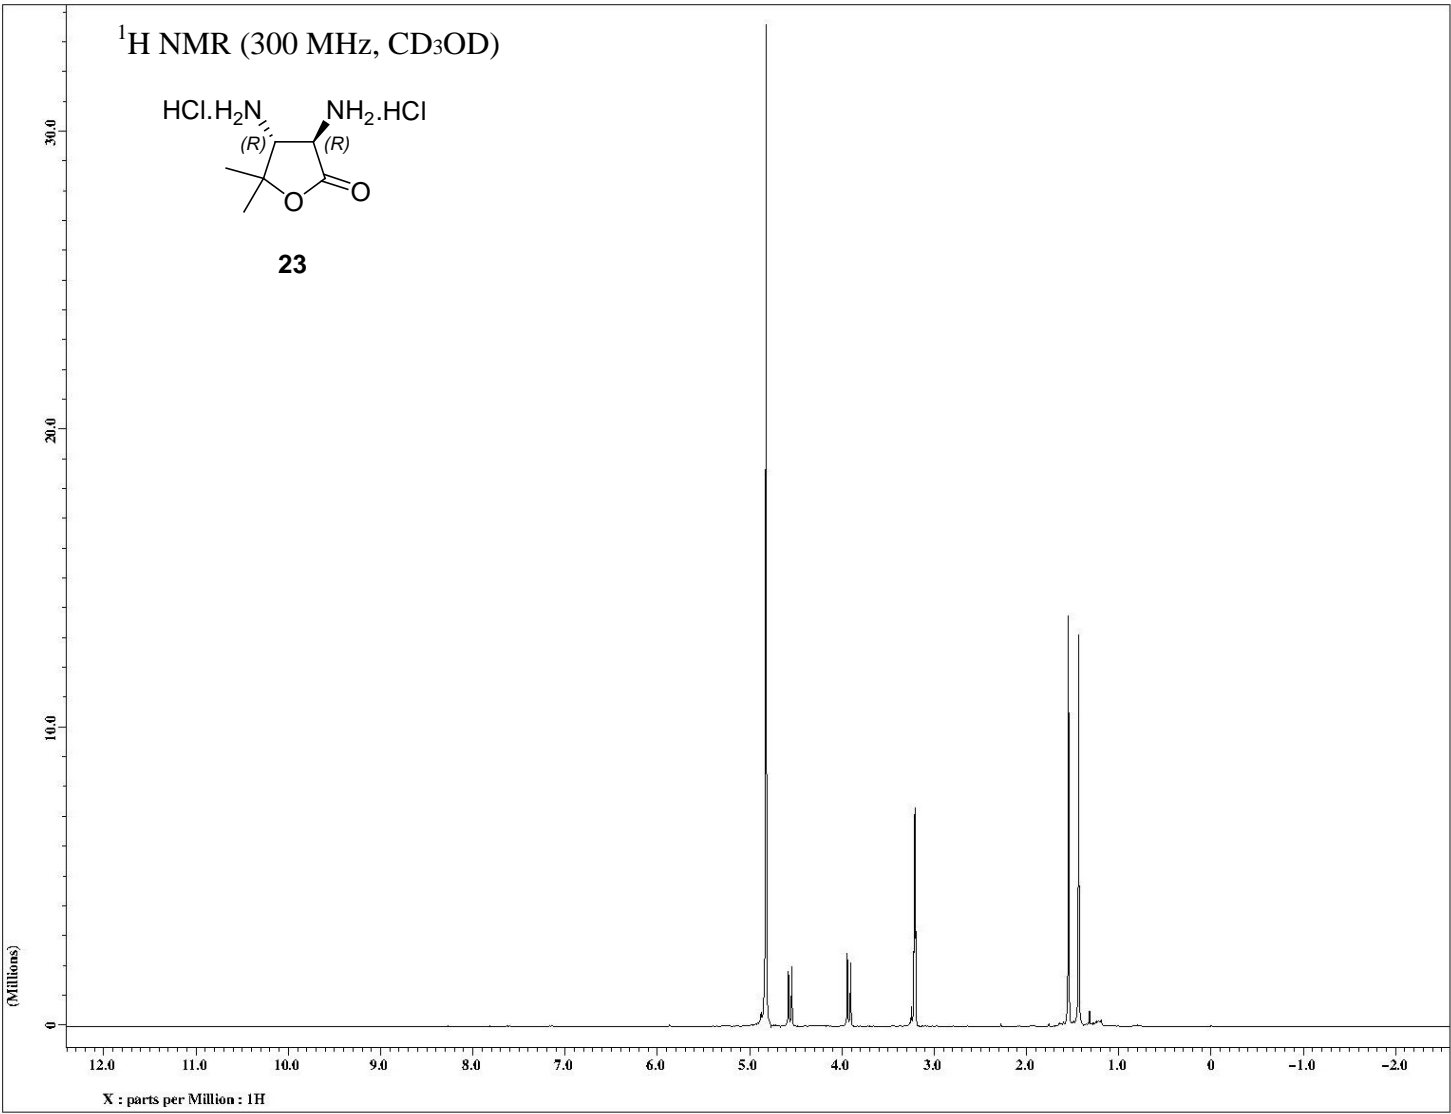

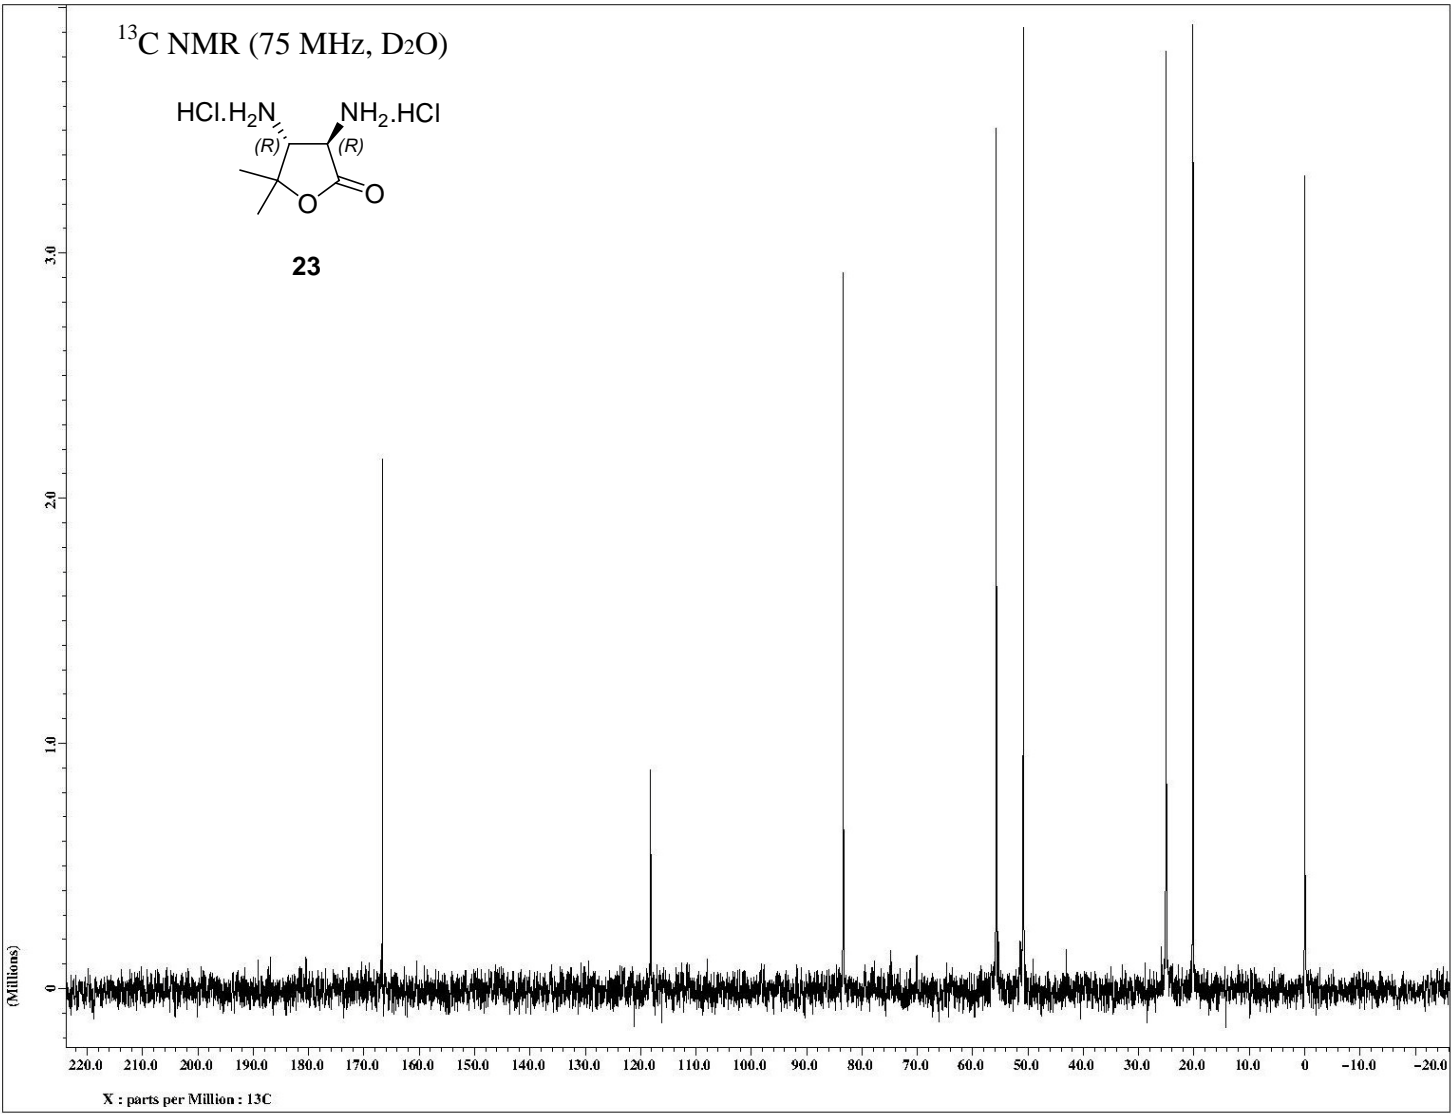

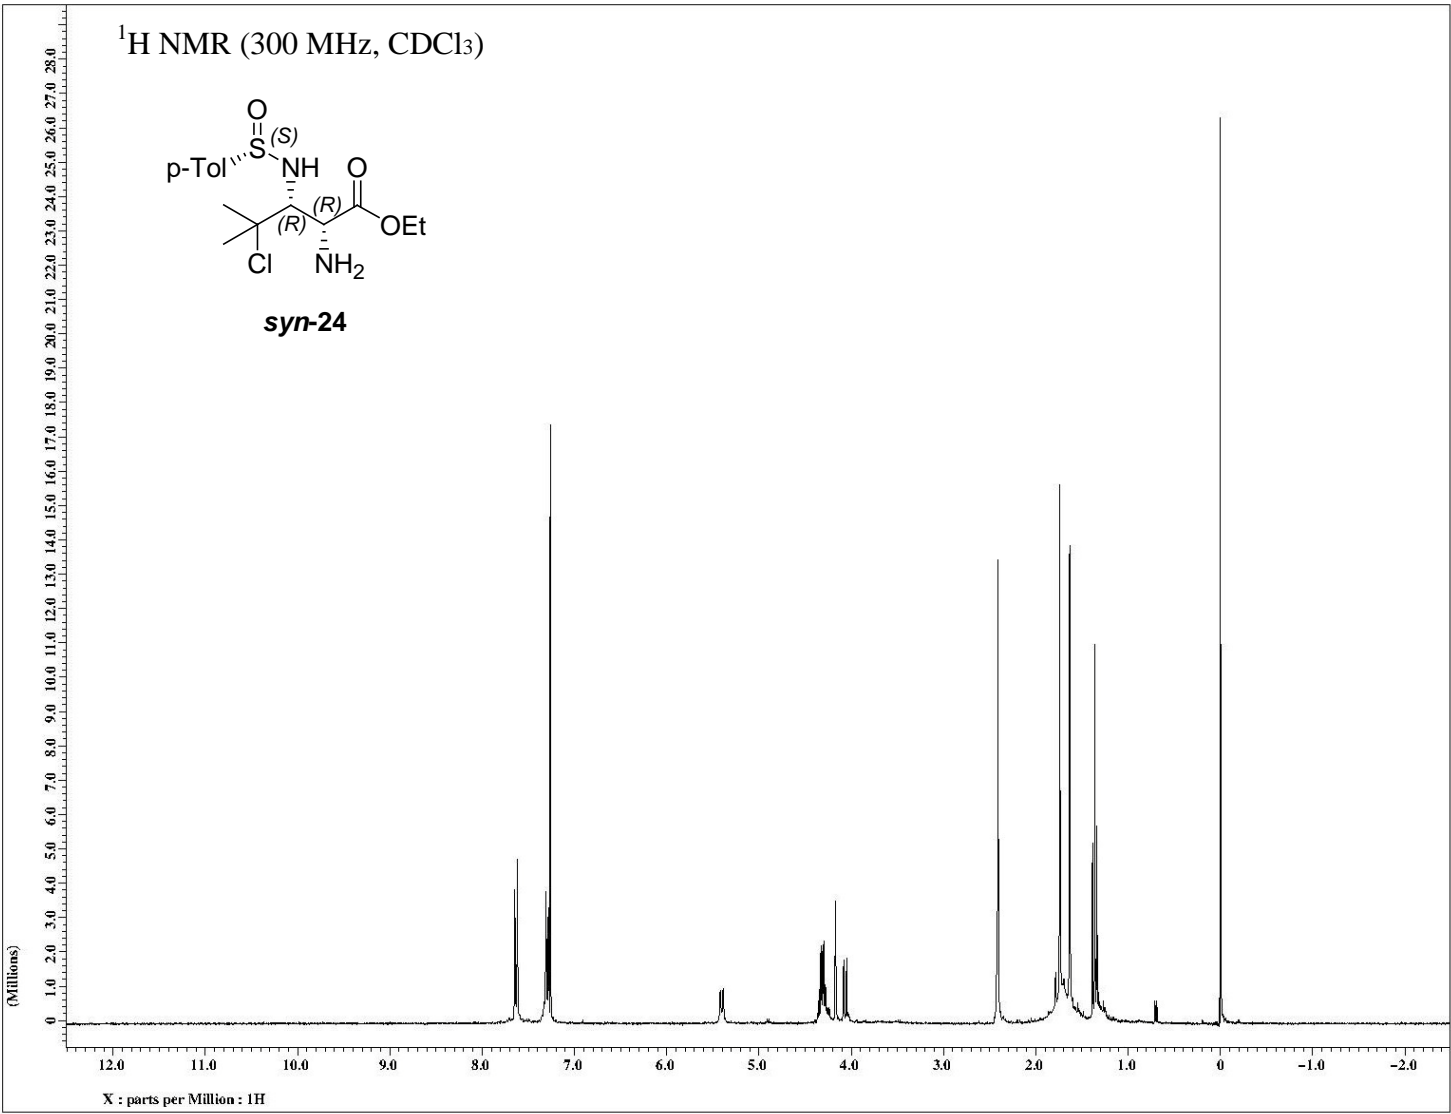

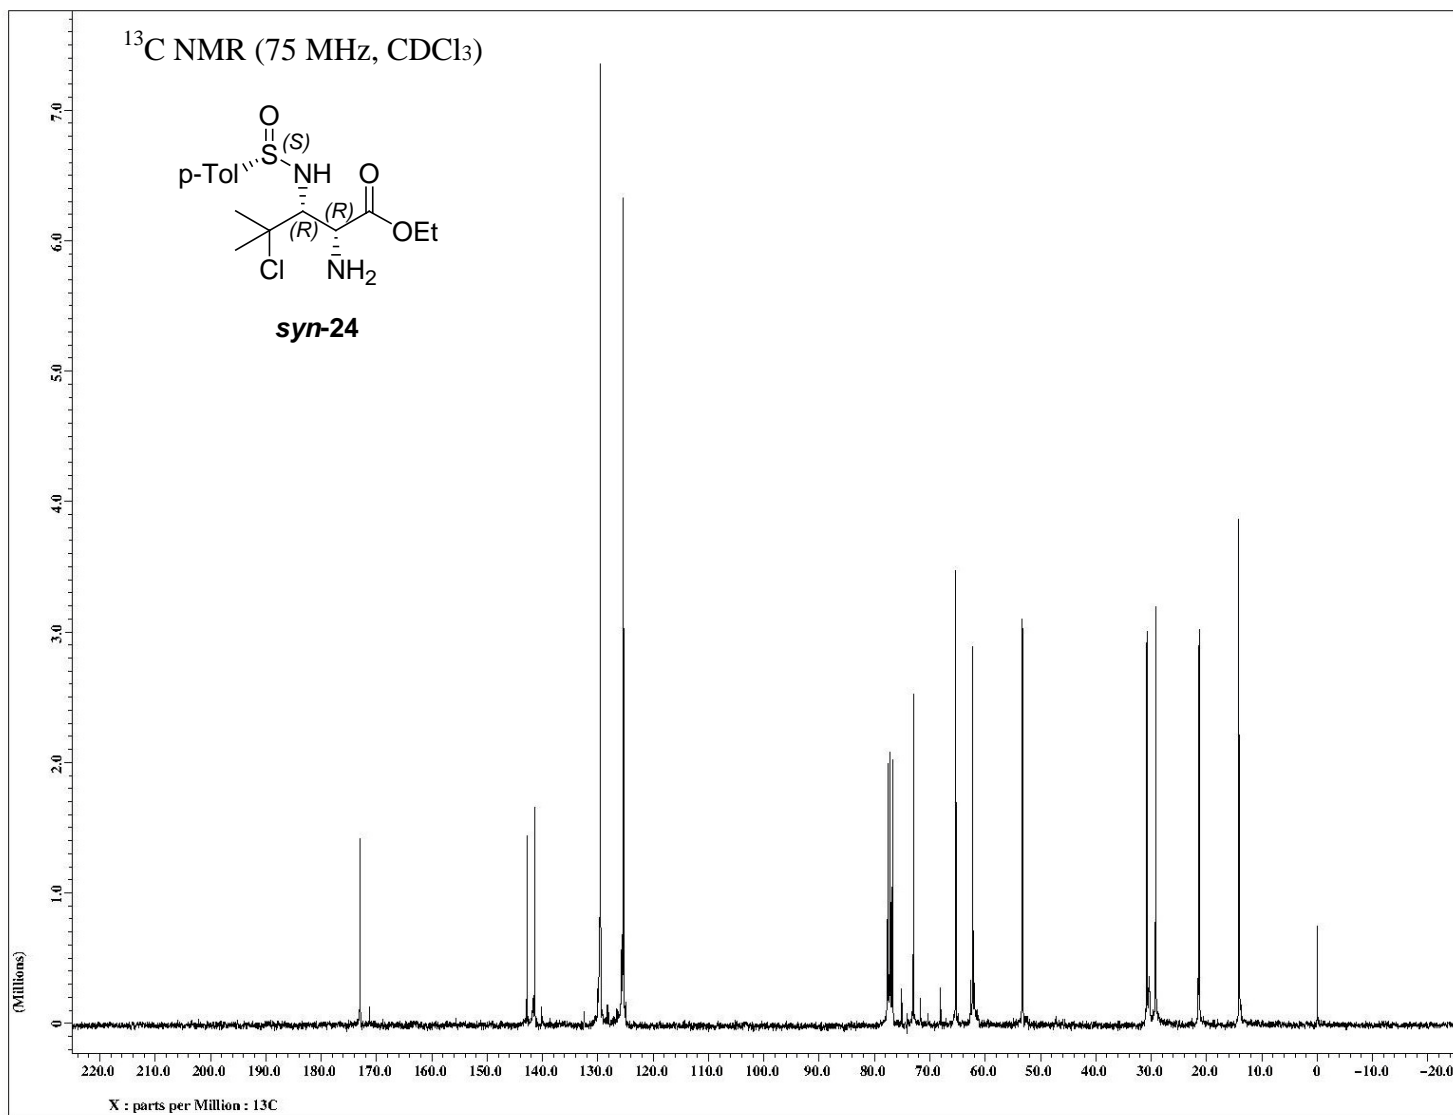

## II. Copy of chiral HPLC spectrum of 16

Column: HPLC Daicel Chiralcel OD-H, 35 °C, 0.5 mL/min, UV 220 nm, injection volume: 25 µL, solvent: hexane/ethanol (99:1)

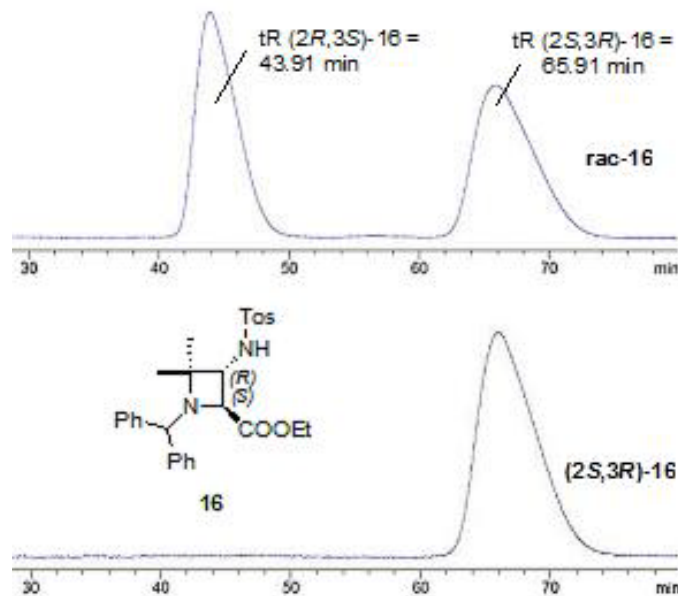

Supplement: c2ob06637h.pdf [file c2ob06637h.pdf]
